# Supplementary material
Source: PubMed Central journal article supplement (PMC8977062)
Supplement: 11696_2022_2170_MOESM1_ESM.pdf [file 11696_2022_2170_MOESM1_ESM.pdf]

## Supplementary Information

### In silico Approach for the Development of Novel Antiviral Compounds Based on SARS-COV-2 Protease Inhibition

Vanja P Ničković, Gordana R Nikolić, Biserka M Nedeljković, Nebojša Mitić, Snežana Filipović Danić, Jadranka Mitić, Zoran Marčetić, Dušan Sokolović, Aleksandar M. Veselinović

#### Table of Content

|                    |    |
|--------------------|----|
| Table S1.....      | 1  |
| Table S2.....      | 4  |
| Table S3.....      | 6  |
| Figures S1-S6..... | 21 |

Table S1. The SMILES notation of the studied molecules, calculated values for the DCW, experimental data (Ac) – expr, the values of Ac calculated with the application of CORAL software – calc, the difference between expr and calc – diff for the built QSPR model

| ID | SMILES                                                                      | Expr   | Split 1   |         |         |          | Split 2   |         |         |          | Split 3   |         |         |          |
|----|-----------------------------------------------------------------------------|--------|-----------|---------|---------|----------|-----------|---------|---------|----------|-----------|---------|---------|----------|
|    |                                                                             |        | DCW(1,15) | Calc    | Diff    | Set      | DCW(1,20) | Calc    | Diff    | Set      | DCW(2,20) | Calc    | Diff    | Set      |
| 1  | <chem>CSe1nc2c(n1C(=O)c1ccc(cc1)OC)c1c(c2)OCCO1</chem>                      | -3.035 | 191.0467  | -2.9774 | -0.0576 | Training | 142.2804  | -2.9829 | -0.0521 | Training | 171.4428  | -3.0608 | 0.0258  | Training |
| 2  | <chem>CCC(c1ccc(cc1)N(C(c1cccnc1)C(=O)NC1CCCC1)C(=O)c1ccc1)C</chem>         | -3.348 | 146.9445  | -3.4638 | 0.1158  | Training | 117.5586  | -3.3695 | 0.0215  | Training | 131.2709  | -3.5282 | 0.1802  | Test     |
| 3  | <chem>ClCC(=O)N1N=C(CC1c1ccc(c(c1)OC)OC)c1ccc1</chem>                       | -3.362 | 148.4575  | -3.4471 | 0.0851  | Training | 122.827   | -3.2871 | -0.0749 | Training | 139.8657  | -3.4282 | 0.0662  | Training |
| 4  | <chem>ClCC(=O)N1N=C(CC1c1ccc(c(c1)OC)OC(F)F)c1ccc1</chem>                   | -3.447 | 158.1734  | -3.34   | -0.107  | Training | 109.3986  | -3.4972 | 0.0502  | Test     | 148.9344  | -3.3227 | -0.1243 | Training |
| 5  | <chem>O=C(C(N(c1c(C)ccc(cc1)C)C(=O)Cn1nc2c1ccc2)c1ccsc1)NC(C)C/C</chem>     | -3.463 | 152.7398  | -3.3999 | -0.0631 | Training | 104.0824  | -3.5803 | 0.1173  | Test     | 131.2839  | -3.5281 | 0.0651  | Training |
| 6  | <chem>CCc1cc(=O)oc2c1ccc(c2)OC(=O)c1ccc1</chem>                             | -3.472 | 146.3027  | -3.4709 | -0.0011 | Training | 101.5378  | -3.6201 | 0.1481  | Training | 135.0344  | -3.4844 | 0.0124  | Test     |
| 7  | <chem>O=c1cc(C)c2c(o1)ccc(c2)OC(=O)c1ccc1</chem>                            | -3.524 | 127.8694  | -3.6742 | 0.1502  | Test     | 114.5477  | -3.4166 | -0.1074 | Training | 132.291   | -3.5163 | -0.0077 | Test     |
| 8  | <chem>ClCC(=O)N1NC(C(=O)C1c1ccc(cc1)OC)c1c[nH]c2c1ccc2</chem>               | -3.554 | 141.2034  | -3.5271 | -0.0269 | Training | 103.567   | -3.5884 | 0.0344  | Training | 132.5728  | -3.5131 | -0.0409 | Training |
| 9  | <chem>COc1cccc1OCCNC(=O)c1cc(=O)[nH]c2c1ccc2</chem>                         | -3.603 | 126.181   | -3.6928 | 0.0898  | Test     | 93.0717   | -3.7525 | 0.1495  | Test     | 120.0341  | -3.6589 | 0.0559  | Training |
| 10 | <chem>Brc1ccc(cc1)C(=O)Cn1nc2c1ccc2</chem>                                  | -3.603 | 108.5679  | -3.8871 | 0.2841  | Test     | 89.83337  | -3.8032 | 0.2002  | Training | 93.83819  | -3.9637 | 0.3607  | Training |
| 11 | <chem>ClCC(=O)N1N=C(CC1c1ccc(c(c1)C)c1ccc1</chem>                           | -3.622 | 121.6509  | -3.7428 | 0.1208  | Test     | 95.02927  | -3.7219 | 0.0999  | Training | 114.1167  | -3.7278 | 0.1058  | Training |
| 12 | <chem>ClCC(=O)N1CCN(CC1)c1nc(CC)nc2c1c1CCC(Cc1s2)C</chem>                   | -3.627 | 135.6303  | -3.5886 | -0.0384 | Training | 98.89386  | -3.6615 | 0.0345  | Test     | 125.4373  | -3.5961 | -0.0309 | Training |
| 13 | <chem>CCOc1ccc2c(c1)C(=O)C(=O)N2CC1COc2c(O1)ccc2</chem>                     | -3.632 | 126.3135  | -3.6914 | 0.0594  | Training | 89.56604  | -3.8073 | 0.1753  | Test     | 110.1557  | -3.7739 | 0.1419  | Training |
| 14 | <chem>ClCC(=O)c1cc(n(c1C)c1ccc(c1)[N+](=O)[O-])C</chem>                     | -3.661 | 116.8458  | -3.7958 | 0.1348  | Training | 93.39686  | -3.7474 | 0.0864  | Training | 108.0849  | -3.798  | 0.137   | Training |
| 15 | <chem>CC(=O)c1cc([nH]c1N1CCCC1)c1ccc1</chem>                                | -3.666 | 125.6978  | -3.6982 | 0.0322  | Training | 93.3048   | -3.7489 | 0.0829  | Training | 112.3184  | -3.7487 | 0.0827  | Training |
| 16 | <chem>O=C(c1cc(=O)[nH]c2c1ccc2)N1CCN(CC1)S(=O)(=O)c1c(C)c(C)ccc1C/C</chem>  | -3.684 | 119.8414  | -3.7628 | 0.0788  | Test     | 102.9719  | -3.5977 | -0.0863 | Test     | 122.9421  | -3.6251 | -0.0589 | Training |
| 17 | <chem>NC(=O)CCn1c(C(=O)c2ccc(cc2)Cl)c2c([n+][O-])ccc2</chem>                | -3.688 | 116.1138  | -3.8039 | 0.1159  | Training | 95.3769   | -3.7165 | 0.0285  | Training | 111.8064  | -3.7547 | 0.0667  | Test     |
| 18 | <chem>O=C(c1cc(=O)[nH]c2c1ccc2)N1CCN(CC1)c1ccc(c1)C(F)F</chem>              | -3.708 | 108.9754  | -3.8826 | 0.1746  | Training | 83.97989  | -3.8947 | 0.1867  | Test     | 102.9201  | -3.8581 | 0.1501  | Training |
| 19 | <chem>COc1cc(C=NNC(=O)Cn2nc3c2ccc3)cc(c1OC)OC</chem>                        | -3.714 | 115.6903  | -3.8085 | 0.0945  | Test     | 101.4737  | -3.6211 | -0.0929 | Training | 120.9777  | -3.648  | -0.066  | Training |
| 20 | <chem>ClCC(=O)N1N=C(CC1c1ccc1)c1ccc(o1)C</chem>                             | -3.716 | 122.6417  | -3.7319 | 0.0159  | Test     | 93.52205  | -3.7455 | 0.0295  | Test     | 133.3605  | -3.5039 | -0.2121 | Training |
| 21 | <chem>O=C(Nc1ccc(c1C(=O)O)c1ccc1)C=C/c1ccc1</chem>                          | -3.718 | 117.9579  | -3.7835 | 0.0655  | Test     | 91.53872  | -3.7765 | 0.0585  | Test     | 114.8707  | -3.719  | 0.001   | Test     |
| 22 | <chem>Clc1ccc(c(c1)n1c(O)c2c(c1O)CC(CC2)OC(=O)c1ccc1</chem>                 | -3.732 | 112.8091  | -3.8403 | 0.1083  | Test     | 88.54481  | -3.8233 | 0.0913  | Test     | 119.2867  | -3.6676 | -0.0644 | Training |
| 23 | <chem>CC(c1ccc(cc1)N(C(c1cccnc1)C(=O)NC1CCCC1)C(=O)c1ccc1)C</chem>          | -3.773 | 119.4615  | -3.767  | -0.006  | Training | 91.32691  | -3.7798 | 0.0068  | Training | 113.2792  | -3.7375 | -0.0355 | Training |
| 24 | <chem>CCC(NC(=O)C(c1cccnc1)N(C(=O)Cn1nc2c1ccc2)c1ccc(cc1)NC(=O)C)C/C</chem> | -3.799 | 106.6723  | -3.908  | 0.109   | Test     | 92.92627  | -3.7548 | -0.0442 | Training | 103.9515  | -3.8461 | 0.0471  | Training |
| 25 | <chem>Clc1ccc(cc1)C(=O)Oc1ccc1</chem>                                       | -3.8   | 111.7303  | -3.8522 | 0.0522  | Training | 87.63408  | -3.8376 | 0.0376  | Training | 101.6611  | -3.8727 | 0.0727  | Training |
| 26 | <chem>CCc1ccc2c(c1)C(NC(=O)C)C(=O)N2CCN1CCOCC1</chem>                       | -3.817 | 107.4081  | -3.8999 | 0.0829  | Test     | 86.17675  | -3.8603 | 0.0433  | Training | 97.24054  | -3.9241 | 0.1071  | Test     |
| 27 | <chem>O=c1[nH]c2ccc2c(c1)C(=O)N1CCN(CC1)c1ccc(c1)C</chem>                   | -3.823 | 112.6391  | -3.8422 | 0.0192  | Training | 95.03444  | -3.7218 | -0.1012 | Training | 96.72072  | -3.9302 | 0.1072  | Test     |
| 28 | <chem>O=C(Nc1nonc1[N+](=O)[O-])CSc1ccc1</chem>                              | -3.849 | 114.8528  | -3.8178 | -0.0312 | Training | 85.39091  | -3.8726 | 0.0236  | Training | 112.6714  | -3.7446 | -0.1044 | Test     |
| 29 | <chem>Brc1ccc(c(c1)C(=O)C=C/c1ccc1)OC(=O)c1ccc1</chem>                      | -3.853 | 114.3391  | -3.8235 | -0.0295 | Training | 78.49294  | -3.9805 | 0.1275  | Training | 94.80878  | -3.9524 | 0.0994  | Training |
| 30 | <chem>O=Cc1cn(nc1c1cccnc1)Cc1ccc1</chem>                                    | -3.858 | 106.0191  | -3.9152 | 0.0572  | Training | 85.4899   | -3.8711 | 0.0131  | Test     | 101.1935  | -3.8781 | 0.0201  | Test     |
| 31 | <chem>CC(=O)NC1C(=O)N(c2c1cc(Br)cc2)CCN1CCOCC1</chem>                       | -3.88  | 107.4031  | -3.9    | 0.02    | Training | 87.3369   | -3.8422 | -0.0378 | Training | 115.5746  | -3.7108 | -0.1692 | Training |

|    |                                                                                   |        |          |         |         |          |          |         |         |          |          |         |         |          |
|----|-----------------------------------------------------------------------------------|--------|----------|---------|---------|----------|----------|---------|---------|----------|----------|---------|---------|----------|
| 32 | COc1cccc(c1)C(N(C(=O)Cn1nnc2c1cccc2)Cc1cccc1)C(=O)NCc1cccc1                       | -3.89  | 103.0469 | -3.948  | 0.058   | Training | 78.02785 | -3.9878 | 0.0978  | Training | 89.66435 | -4.0123 | 0.1223  | Test     |
| 33 | COc1ccc(cc1)N(C1(CCCCC1)C(=O)NC1CCCC1)C(=O)Cn1nnc2c1cccc2                         | -3.897 | 102.0423 | -3.9591 | 0.0621  | Training | 80.24485 | -3.9531 | 0.0561  | Test     | 100.7647 | -3.8831 | -0.0139 | Training |
| 34 | COc1cccc1/C=C/C(=O)c1ccc(Br)ccc1OC(=O)c1cccc1                                     | -3.951 | 115.6705 | -3.8088 | -0.1422 | Training | 85.82502 | -3.8658 | -0.0852 | Training | 99.71205 | -3.8954 | -0.0556 | Test     |
| 35 | CC(=O)NC1C(=O)N(c2c1cc(F)cc2)CCN1CCCC1                                            | -3.959 | 94.73635 | -4.0397 | 0.0807  | Training | 79.21946 | -3.9692 | 0.0102  | Training | 85.56653 | -4.06   | 0.101   | Training |
| 36 | COc1ccc(cc1)C(N(C(=O)Cn1nnc2c1cccc2)c1ccc(cc1)NC(=O)C)C(=O)NCC1CCCC1              | -3.971 | 88.85384 | -4.1046 | 0.1336  | Training | 72.31236 | -4.0772 | 0.1062  | Training | 88.76433 | -4.0227 | 0.0517  | Training |
| 37 | NC(=O)CCn1c(C(=O)c2ccc(cc2)C)c2c([n+][O-])cccc2                                   | -3.971 | 86.25872 | -4.1332 | 0.1622  | Training | 72.77988 | -4.0699 | 0.0989  | Training | 83.47973 | -4.0842 | 0.1132  | Training |
| 38 | O=C1NC(=O)N(C(=O)/C1=C/C1CNc2c1cccc2)c1cccc1F                                     | -3.976 | 100.1775 | -3.9797 | 0.0037  | Training | 77.57438 | -3.9949 | 0.0189  | Training | 78.69751 | -4.1399 | 0.1639  | Training |
| 39 | ClCC(=O)N(c1cccc1)NC(=O)Nc1cccc1                                                  | -3.984 | 93.5311  | -4.053  | 0.069   | Training | 68.47335 | -4.1372 | 0.1532  | Test     | 93.04135 | -3.973  | -0.011  | Training |
| 40 | COc1ccc2c(c1)C(=O)C(=O)N2CC1COe2c(O1)cccc2                                        | -3.988 | 91.2584  | -4.078  | 0.09    | Training | 76.57903 | -4.0104 | 0.0224  | Training | 88.98712 | -4.0202 | 0.0322  | Test     |
| 41 | NC(=O)CCn1c(C(=O)c2cc(Cl)c(c2)Cl)N)c2c([n+][O-])cccc2                             | -3.992 | 100.8193 | -3.9726 | -0.0194 | Training | 72.62637 | -4.0723 | 0.0803  | Test     | 89.78303 | -4.0109 | 0.0189  | Training |
| 42 | ClCC(=O)N1CCc2c(C1c1ccc(Br)ccc1F)ccc2c(O)C                                        | -3.995 | 96.06595 | -4.025  | 0.03    | Training | 73.22992 | -4.0628 | 0.0678  | Training | 104.7472 | -3.8368 | -0.1582 | Training |
| 43 | Clc1ccc(cc1)C(=O)Cn1nnc2c1cccc2                                                   | -3.996 | 108.2881 | -3.8902 | -0.1058 | Training | 80.23363 | -3.9533 | -0.0427 | Training | 92.64401 | -3.9776 | -0.0184 | Training |
| 44 | O=c1[nH]c2cccc2c(c1)C(=O)N1CC(NC1)c1cccc1                                         | -3.998 | 106.8171 | -3.9064 | -0.0916 | Training | 82.37216 | -3.9198 | -0.0782 | Training | 88.74021 | -4.023  | 0.025   | Test     |
| 45 | O=C(N1c2cccc2Sc2c1cccc2)Sc1nnc(s1)C                                               | -4.019 | 99.55612 | -3.9865 | -0.0325 | Training | 70.72021 | -4.1021 | 0.0831  | Training | 88.83119 | -4.022  | 0.003   | Training |
| 46 | COc1cccc(c1)C(N(C(=O)Cn1nnc2c1cccc2)C1CC1)C(=O)Nc1ccc(cc1)F                       | -4.022 | 88.29946 | -4.1107 | 0.0887  | Training | 76.73848 | -4.008  | -0.014  | Training | 84.24669 | -4.0753 | 0.0533  | Training |
| 47 | ClCC(=O)N(c1cn(c2c1cccc2)C(=O)C)c1ccc(cc1)[N+](=O)[O-]                            | -4.034 | 99.52477 | -3.9869 | -0.0471 | Training | 73.28342 | -4.062  | 0.028   | Test     | 88.37324 | -4.0273 | -0.0067 | Training |
| 48 | CC(C12CN(CC(C2=O)(CN(C1)C(=O)c1cccc1)[N+](=O)[O-])C(C)C)C(=O)c1cccc1[N+](=O)[O-]C | -4.046 | 89.21029 | -4.1006 | 0.0546  | Training | 74.482   | -4.0432 | -0.0028 | Training | 88.30246 | -4.0281 | -0.0179 | Training |
| 49 | O=C1C(=O)c2c(N1C/C=C/c1cccc1)cccc2                                                | -4.049 | 82.64793 | -4.173  | 0.124   | Test     | 68.15264 | -4.1422 | 0.0932  | Training | 73.03257 | -4.2058 | 0.1568  | Training |
| 50 | COc1cccc(c1)C(N(C(=O)Cn1nnc2c1cccc2)c1ccc(cc1)NC(=O)C)C(=O)NCC1CCCC1              | -4.049 | 97.2821  | -4.0116 | -0.0374 | Training | 74.11691 | -4.049  | 0       | Training | 91.80906 | -3.9873 | -0.0617 | Training |
| 51 | Br1ccc(c(c1)C(=O)C=C/c1ccc(cc1)C)OC(=O)c1cccc1                                    | -4.049 | 87.55596 | -4.1189 | 0.0699  | Training | 82.51209 | -3.9177 | -0.1313 | Training | 88.59285 | -4.0247 | -0.0243 | Training |
| 52 | Clc1ccc(cc1)C(=O)Nc1ccc2c(c1)ncn2C                                                | -4.056 | 94.90826 | -4.0378 | -0.0182 | Training | 71.36199 | -4.092  | 0.036   | Training | 83.76051 | -4.081  | 0.025   | Test     |
| 53 | ClCC(=O)Nc1sc(c(c1)C(=O)c1cccc1)C)C                                               | -4.066 | 99.17473 | -3.9907 | -0.0753 | Test     | 76.20326 | -4.0163 | -0.0497 | Training | 89.65857 | -4.0123 | -0.0537 | Test     |
| 54 | CCC(NC(=O)C(N(C(=O)Cn1nnc2c1cccc2)c1ccc(cc1)NC(=O)C)c1ccc(cc1)O)C)C               | -4.073 | 96.13088 | -4.0243 | -0.0487 | Training | 71.80961 | -4.085  | 0.012   | Training | 94.95083 | -3.9508 | -0.1222 | Test     |
| 55 | O=C(Nc1cccc(c1)S(=O)(=O)N(C)C)CSc1ccc2c1nccc2                                     | -4.081 | 87.24246 | -4.1223 | 0.0413  | Training | 71.79017 | -4.0853 | 0.0043  | Test     | 73.63405 | -4.1988 | 0.1178  | Training |
| 56 | OC(=O)c1ccc2c(c1)scn2                                                             | -4.084 | 94.39792 | -4.0434 | -0.0406 | Training | 63.2961  | -4.2182 | 0.1342  | Training | 78.58027 | -4.1412 | 0.0572  | Training |
| 57 | Cc1ccc(cc1)C(=O)Oc1ccc2c(c1)ncn2C                                                 | -4.106 | 95.14946 | -4.0351 | -0.0709 | Test     | 70.46195 | -4.1061 | 0.0001  | Test     | 85.10342 | -4.0653 | -0.0407 | Training |
| 58 | O=C(Nc1ccc(c(c1)C)Br)COn1nnc2c1ccc2)S(=O)(=O)C                                    | -4.126 | 92.16972 | -4.068  | -0.058  | Training | 68.79412 | -4.1322 | 0.0062  | Training | 79.88922 | -4.126  | 0       | Test     |
| 59 | ClCC(=O)N(c1ccc(cc1)OC)Cc1cc(=O)[nH]c2c1cccc2                                     | -4.148 | 99.71531 | -3.9848 | -0.1632 | Test     | 74.56897 | -4.0419 | -0.1061 | Training | 93.67463 | -3.9656 | -0.1824 | Training |
| 60 | CC(=O)Nc1ccc(cc1)N(C(c1ccc(c(c1)O)O)C(=O)NC1CCCC1)C(=O)Cn1nnc2c1cccc2             | -4.151 | 91.62113 | -4.074  | -0.077  | Test     | 65.34174 | -4.1862 | 0.0352  | Training | 75.67461 | -4.175  | 0.024   | Training |
| 61 | Br1nccc(c1)C(=O)NN=Cc1c(O)ccc2c1cccc2                                             | -4.159 | 88.14523 | -4.1124 | -0.0466 | Training | 67.41464 | -4.1538 | -0.0052 | Training | 71.3351  | -4.2255 | 0.0665  | Training |
| 62 | O=C(C(N(C(=O)Cn1nnc2c1cccc2)c1ccc2c(c1)CCC2)c1cccc1)NCc1cccc1                     | -4.18  | 94.4661  | -4.0427 | -0.1373 | Training | 68.98147 | -4.1293 | -0.0507 | Training | 84.33834 | -4.0742 | -0.1058 | Training |
| 63 | NC(=O)CCn1[n+][O-]c2c(c1C(=O)c1ccc(cc1)[N+](=O)[O-])cccc2                         | -4.183 | 90.15153 | -4.0902 | -0.0928 | Training | 72.84963 | -4.0688 | -0.1142 | Training | 82.01439 | -4.1013 | -0.0817 | Training |
| 64 | O=C(c1cccnc1)OCC(=O)N1c2cccc2Sc2c1cccc2                                           | -4.207 | 75.03295 | -4.257  | 0.05    | Training | 65.31577 | -4.1866 | -0.0204 | Test     | 69.85804 | -4.2427 | 0.0357  | Training |
| 65 | ClCC(=O)N(CCc1cccc1)CCc1cccc1                                                     | -4.212 | 86.13061 | -4.1346 | -0.0774 | Test     | 71.32331 | -4.0926 | -0.1194 | Training | 75.27312 | -4.1797 | -0.0323 | Training |
| 66 | Cc1ccc(cc1)C(=O)N1nnc2c1cccc2                                                     | -4.228 | 72.84283 | -4.2812 | 0.0532  | Test     | 67.68673 | -4.1495 | -0.0785 | Training | 77.97949 | -4.1482 | -0.0798 | Training |

|    |                                                            |        |          |         |         |          |          |         |         |          |          |         |         |          |
|----|------------------------------------------------------------|--------|----------|---------|---------|----------|----------|---------|---------|----------|----------|---------|---------|----------|
| 67 | Clc1ccc(c(c1)n1c(O)ccc1O)OC(=O)c1ccc1                      | -4.265 | 80.70575 | -4.1944 | -0.0706 | Training | 62.17387 | -4.2357 | -0.0293 | Training | 70.5261  | -4.2349 | -0.0301 | Training |
| 68 | O=C1C(=O)c2c(N1CCCc1ccc1)ccc2                              | -4.268 | 74.03118 | -4.2681 | 0.0001  | Test     | 57.57805 | -4.3076 | 0.0396  | Training | 63.79414 | -4.3133 | 0.0453  | Test     |
| 69 | NC(=O)CCn1c(C(=O)c2ccc(cc2)C)c2c([n+][O-])ccc(cc2)C(F)(F)F | -4.303 | 93.86246 | -4.0493 | -0.2537 | Training | 65.04741 | -4.1908 | -0.1122 | Test     | 73.57098 | -4.1995 | -0.1035 | Training |
| 70 | O=C1C(=O)c2c(N1CC1COc3c(O)ccc3)ccc2                        | -4.318 | 77.54426 | -4.2293 | -0.0887 | Test     | 64.65189 | -4.197  | -0.121  | Training | 79.97669 | -4.125  | -0.193  | Training |
| 71 | O=C1c2ccc(c2N(C1=O)CCOc1ccc1)C                             | -4.332 | 72.55486 | -4.2843 | -0.0477 | Training | 59.88549 | -4.2715 | -0.0605 | Training | 69.85021 | -4.2428 | -0.0892 | Training |
| 72 | CCN(C(=O)Cn1cc(c2c1ccc2)C=C1C(=O)NC(=O)N(C1=O)c1ccc1F)CC   | -4.342 | 66.99827 | -4.3456 | 0.0036  | Training | 54.32391 | -4.3585 | 0.0165  | Training | 56.40038 | -4.3993 | 0.0573  | Training |
| 73 | O=C(Nc1cccn1)C=C/c1ccc1Cl                                  | -4.383 | 63.25761 | -4.3869 | 0.0039  | Test     | 56.46077 | -4.3251 | -0.0579 | Training | 54.0935  | -4.4261 | 0.0431  | Test     |
| 74 | Cc1ccc(cc1)c1n[nH]c(c1)NC(=O)c1ccc1[N+](=O)[O-]            | -4.386 | 59.29294 | -4.4306 | 0.0446  | Training | 42.35587 | -4.5457 | 0.1597  | Training | 60.56534 | -4.3508 | -0.0352 | Test     |
| 75 | Fc1ccc2c(c1)CCC(N2CC(=O)N1CCC2C(C1)c1cc(C)ccc1N2)C         | -4.403 | 62.79251 | -4.392  | -0.011  | Training | 56.69212 | -4.3215 | -0.0815 | Test     | 54.70272 | -4.419  | 0.016   | Training |
| 76 | COc1ccc(c1)C=NNC(=S)Nc1cccn1                               | -4.41  | 60.81144 | -4.4139 | 0.0039  | Training | 51.2253  | -4.407  | -0.003  | Training | 52.48002 | -4.4449 | 0.0349  | Training |
| 77 | O=C(NC1cccn1)C=C/c1ccc(c1)[N+](=O)[O-]Cl                   | -4.444 | 46.63089 | -4.5703 | 0.1263  | Training | 52.48817 | -4.3872 | -0.0568 | Training | 49.81521 | -4.4759 | 0.0319  | Training |
| 78 | O=C(C(N(C(=O)c1esnm1)c1ccc(cc1)C(C)C)c1cccn1)NC1CCCC1      | -4.449 | 67.40309 | -4.3412 | -0.1078 | Training | 54.71848 | -4.3523 | -0.0967 | Training | 65.94762 | -4.2882 | -0.1608 | Training |
| 79 | O=C(Nc1cccn1)Cc1ccc(c(c1)Cl)Cl                             | -4.449 | 56.50075 | -4.4614 | 0.0124  | Training | 48.92512 | -4.4429 | -0.0061 | Training | 38.42962 | -4.6084 | 0.1594  | Test     |
| 80 | COc1ccc2c(c1)ccc(c2)C1(C)NC(=O)N(C1=O)CC(=O)NCc1ccc1       | -4.493 | 52.64497 | -4.504  | 0.011   | Training | 49.79411 | -4.4294 | -0.0636 | Training | 49.93528 | -4.4745 | -0.0185 | Training |
| 81 | O=C(N1CCOCC1)Cn1cc(c2c1ccc2)C=C1C(=O)NC(=O)N(C1=O)c1ccc1F  | -4.535 | 52.017   | -4.5109 | -0.0241 | Training | 41.1522  | -4.5645 | 0.0295  | Training | 54.16679 | -4.4253 | -0.1097 | Training |
| 82 | Cc1cc(n1)C(=O)c1ccc(c(c1)Br)C)C                            | -4.543 | 44.31838 | -4.5958 | 0.0528  | Training | 47.85184 | -4.4597 | -0.0833 | Test     | 48.2726  | -4.4939 | -0.0491 | Training |
| 83 | O=C(Nc1cccn1)C=C/c1c(F)ccc1Cl                              | -4.566 | 63.83912 | -4.3805 | -0.1855 | Training | 42.75936 | -4.5394 | -0.0266 | Training | 48.1481  | -4.4953 | -0.0707 | Training |
| 84 | COCN(c1c(CC)ccc1CC)C(=O)Cn1nnc2c1ccc2                      | -4.608 | 55.4706  | -4.4728 | -0.1352 | Training | 44.65676 | -4.5097 | -0.0983 | Training | 42.92453 | -4.5561 | -0.0519 | Training |

Table S2. The example of DCW(1,20) calculation.

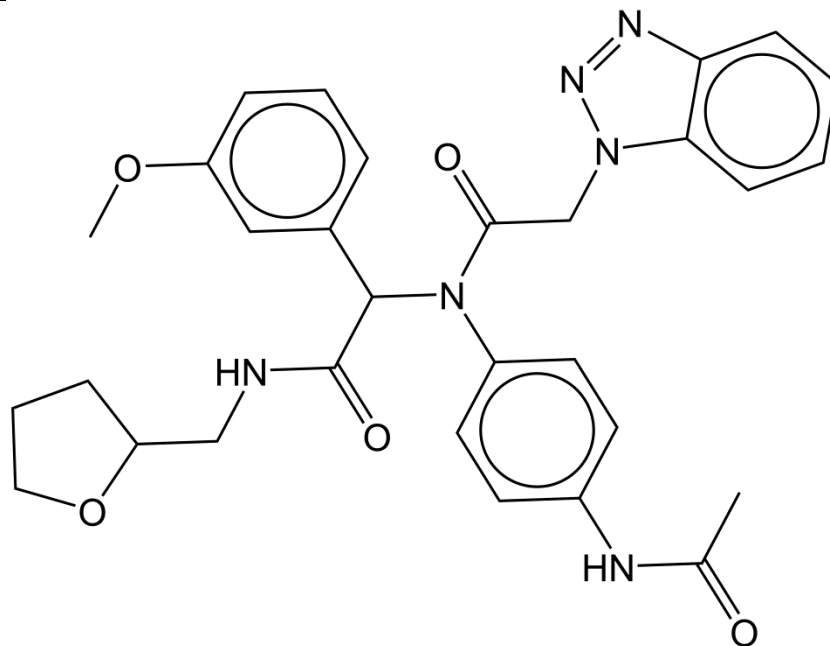

SMILES notation:

COc1cccc(c1)C(N(C(=O)Cn1nnc2c1cccc2)c1ccc(cc1)NC(=O)C)C(=O)NCC1CCCO1

DCW = 74.11691

Prediction for EndPoint = -4.0490

|        |         |            |         |            |         |              |         |
|--------|---------|------------|---------|------------|---------|--------------|---------|
| C..... | 0.3306  | (.....     | -0.9927 | c...c..... | 0.3214  | n...n...c... | 0.0856  |
| O..... | -0.7382 | C.....     | 0.3306  | c...c..... | 0.3214  | n...c...2... | -0.0548 |
| c..... | -0.7267 | (.....     | -0.9927 | c...(..... | 0.202   | c...2...c... | 0.3196  |
| 1..... | -0.725  | =.....     | 0.298   | c...(..... | 0.202   | 2...c...1... | -0.959  |
| c..... | -0.7267 | O.....     | -0.7382 | c...c..... | 0.3214  | c...1...c... | 1.5745  |
| c..... | -0.7267 | (.....     | -0.9927 | c...1..... | 0.1033  | c...c...1... | 0.0646  |
| c..... | -0.7267 | N.....     | 0.0542  | 1...(..... | -0.682  | c...c...c... | 0.3652  |
| c..... | -0.7267 | C.....     | 0.3306  | N...(..... | -0.8114 | c...c...c... | 0.3652  |
| (..... | -0.9927 | C.....     | 0.3306  | N...C..... | -0.6558 | c...c...2... | 0.4611  |
| c..... | -0.7267 | 1.....     | -0.725  | C...(..... | -0.5067 | c...2...(... | -0.6595 |
| 1..... | -0.725  | C.....     | 0.3306  | =...(..... | -0.2762 | c...(...2... | -0.1228 |
| (..... | -0.9927 | C.....     | 0.3306  | O...=..... | -0.9352 | 1...c...(... | 0.5233  |
| C..... | 0.3306  | C.....     | 0.3306  | O...(..... | 0.2537  | c...1...c... | 1.5745  |
| (..... | -0.9927 | O.....     | -0.7382 | C...(..... | -0.5067 | c...c...1... | 0.0646  |
| N..... | 0.0542  | 1.....     | -0.725  | C...(..... | -0.5067 | c...c...c... | 0.3652  |
| (..... | -0.9927 | O...C..... | 0.0436  | C...(..... | -0.5067 | c...c...(... | 1.6158  |
| C..... | 0.3306  | c...O..... | 0.3363  | C...(..... | -0.5067 | c...(...c... | 0.1717  |
| (..... | -0.9927 | c...1..... | 0.1033  | =...(..... | -0.2762 | c...c...(... | 1.6158  |
| =..... | 0.298   | c...1..... | 0.1033  | O...=..... | -0.9352 | c...c...1... | 0.0646  |
| O..... | -0.7382 | c...c..... | 0.3214  | O...(..... | 0.2537  | c...1...(... | 0.364   |
| (..... | -0.9927 | c...c..... | 0.3214  | N...(..... | -0.8114 | N...(...1... | 0.0087  |
| C..... | 0.3306  | c...c..... | 0.3214  | N...C..... | -0.6558 | C...N...(... | 0.1869  |

|        |         |            |         |               |         |              |         |
|--------|---------|------------|---------|---------------|---------|--------------|---------|
| n..... | 0.3619  | c...(..... | 0.202   | C...C.....    | -0.7029 | N..C...(...  | -0.6811 |
| 1..... | -0.725  | c...(..... | 0.202   | C...1.....    | 0.0167  | C...(=...    | 0.1504  |
| n..... | 0.3619  | c...1..... | 0.1033  | C...1.....    | 0.0167  | O...=...(... | -0.6501 |
| n..... | 0.3619  | 1...(..... | -0.682  | C...C.....    | -0.7029 | =...O...(... | -0.7415 |
| c..... | -0.7267 | C...(..... | -0.5067 | C...C.....    | -0.7029 | O...(C...    | 0.2791  |
| 2..... | 0.6779  | C...(..... | -0.5067 | O...C.....    | 0.0436  | (...C...(... | 0.1825  |
| c..... | -0.7267 | N...(..... | -0.8114 | O...1.....    | 0.0231  | C...(C...    | -0.7918 |
| 1..... | -0.725  | N...(..... | -0.8114 | c...O...C...  | -1.2198 | (...C...(... | 0.1825  |
| c..... | -0.7267 | C...(..... | -0.5067 | O...c...1...  | 0.425   | C...(=...    | 0.1504  |
| c..... | -0.7267 | C...(..... | -0.5067 | c...1...c...  | 1.5745  | O...=...(... | -0.6501 |
| c..... | -0.7267 | =...(..... | -0.2762 | c...c...1...  | 0.0646  | =...O...(... | -0.7415 |
| c..... | -0.7267 | O...=..... | -0.9352 | c...c...c...  | 0.3652  | O...(N...    | 0.476   |
| 2..... | 0.6779  | O...(..... | 0.2537  | c...c...c...  | 0.3652  | C...N...(... | 0.1869  |
| (..... | -0.9927 | C...(..... | -0.5067 | c...c...(...  | 1.6158  | N..C...C...  | 2.0352  |
| c..... | -0.7267 | n...C..... | 0.3088  | c...(c...     | 0.1717  | C...C...1... | 0.0438  |
| 1..... | -0.725  | n...1..... | 0.3079  | 1...c...(...  | 0.5233  | C...1...C... | 0.6494  |
| c..... | -0.7267 | n...1..... | 0.3079  | c...1...(...  | 0.364   | C...C...1... | 0.0438  |
| c..... | -0.7267 | n...n..... | -0.0491 | C...(c...1... | -0.6398 | C...C...C... | 2.3965  |
| c..... | -0.7267 | n...c..... | 0.2585  | (...C...(...  | 0.1825  | O...C...C... | 0.6191  |
| (..... | -0.9927 | c...2..... | 0.0387  | N...(C...     | 0.085   | C...O...1... | 2.0395  |
| c..... | -0.7267 | c...2..... | 0.0387  | (...N...(...  | 0.3534  | Cmax.2.....  | 0.4289  |
| c..... | -0.7267 | c...1..... | 0.1033  | N...(C...     | 0.085   | Nmax.3.....  | 0.3646  |
| 1..... | -0.725  | c...1..... | 0.1033  | (...C...(...  | 0.1825  | Omax.5.....  | 0.1192  |
| (..... | -0.9927 | c...c..... | 0.3214  | C...(=...     | 0.1504  | Smax.0.....  | 2.2498  |
| N..... | 0.0542  | c...c..... | 0.3214  | O...=...(...  | -0.6501 | NOSP1000000  | -0.3719 |
| C..... | 0.3306  | c...c..... | 0.3214  | =...O...(...  | -0.7415 | HALO0000000  | 0.233   |
| (..... | -0.9927 | c...2..... | 0.0387  | O...(C...     | 0.2791  | BOND1000000  | 7.2238  |
| =..... | 0.298   | 2...(..... | 0.0833  | n...C...(...  | -0.8626 | ++++N---O=== | 0.2501  |
| O..... | -0.7382 | c...(..... | 0.202   | C...n...1...  | -0.2063 | ++++O---B2== | 2.9152  |
| (..... | -0.9927 | c...1..... | 0.1033  | n...1...n...  | 0.4243  | ++++N---B2== | -0.7011 |
| C..... | 0.3306  | c...1..... | 0.1033  | n...n...1...  | 0.1287  | 1001000000   | -0.7302 |

Table S3. The list of SAKs together with their correlation weights for the three runs of the Monte Carlo optimization

| SAk           | CW(SAk)  |          |          | SAk          | CW(SAk)  |          |          | SAk          | CW(SAk)  |          |          |
|---------------|----------|----------|----------|--------------|----------|----------|----------|--------------|----------|----------|----------|
|               | Run 1    | Run 2    | Run 3    |              | Run 1    | Run 2    | Run 3    |              | Run 1    | Run 2    | Run 3    |
| 10001000000   | 1.98664  | 2.27544  | 1.35382  | P3E0N...4..  | 0.3584   | 0.01539  | -0.98214 | VS3-N...2... | 0.26991  | 1.09438  | 0.19551  |
| 10001000010   | -0.72891 | 0.27326  | 0.32472  | P3E0N...5..  | -0.39881 | 2.04352  | 1.15591  | VS3-N...18.. | 2.0281   | 0.04224  | 2.05989  |
| 10001000100   | 2.24986  | 3.43461  | 0.22897  | P3E0N...6..  | -0.67431 | 1.14733  | 2.55625  | VS3-N...21.. | -0.59394 | 0.26275  | 0.62548  |
| 10001001010   | 2.94961  | 2.58351  | 0.50054  | P3E0O...0..  | 0.73666  | 0.00618  | 0.41387  | VS3-N...3... | -0.43072 | -0.16403 | -0.56379 |
| 10011000000   | 0.39547  | -0.61024 | -0.73024 | P3E0O...1..  | -0.03662 | -0.15695 | 0.36075  | VS3-N...4... | -1.06775 | 0.49606  | -0.14748 |
| 10011000010   | -0.2757  | 1.79927  | -0.26908 | P3E0O...2..  | 0.47288  | 0.29205  | 0.26172  | VS3-N...5... | 2.34496  | 0.09555  | 2.38251  |
| 10011000100   | 2.33604  | -0.16396 | 0.06994  | P3E0O...3..  | 1.13242  | 0.39796  | -0.41148 | VS3-N...6... | 0.07346  | 0.4755   | 0.08364  |
| 10011001000   | -0.85671 | 0.04454  | 0.3673   | P3E0O...4..  | -1.2048  | -0.38613 | -0.47251 | VS3-N...7... | -0.08855 | 0.08477  | 0.25709  |
| 10011001100   | -0.59413 | 0.42778  | -0.98949 | P3E0O...5..  | 1.15198  | 1.41134  | 2.15261  | VS3-N...8... | -0.82887 | -1.39248 | 0.16578  |
| 10011001110   | 0.02936  | -0.9032  | -0.50803 | P3E0S...1..  | -0.04159 | 2.23028  | 0.05101  | VS3-N...9... | -0.61473 | 2.39244  | 0.08356  |
| 10011100000   | 0.84864  | 0.28716  | 0.5095   | P3E0S...2..  | -0.1077  | 2.26042  | 0.10082  | VS3-O...10.. | -0.98442 | 0.03972  | 0.41766  |
| 10011100010   | -1.06951 | 1.32     | -1.49467 | P3E0S...4..  | -0.52578 | -0.53894 | 0.49903  | VS3-O...11.. | -0.12214 | 0.2286   | 0.20569  |
| (...C.....    | 0.15483  | 0.45292  | 0.02298  | P3E0o...1..  | -0.47041 | -0.30238 | 0.29349  | VS3-O...14.. | -0.26955 | 0.28529  | 0.18478  |
| (.....        | 0.38036  | 0.17096  | -0.99268 | P3E0o...2..  | 0.29344  | -1.11985 | -0.75162 | VS3-O...2... | 0.16955  | 1.26025  | -0.63129 |
| (...C...(...  | 0.08002  | -0.60754 | 0.18247  | P3E0s...1..  | 0.3301   | -0.34274 | 0.48285  | VS3-O...3... | 0.42146  | 0.16528  | 0.2101   |
| (...F...(...  | -0.76706 | 0.06024  | 0.20595  | P3E0s...2..  | 2.12958  | 1.65995  | 0.30903  | VS3-O...4... | 0.39112  | 0.32534  | 0.26008  |
| (...Br...(... | -1.43206 | -2.69818 | -0.91521 | P3E0s...3..  | 1.27117  | 1.23571  | 1.16169  | VS3-O...5... | 0.2209   | -0.04264 | 0.15801  |
| (...Cl...(... | -0.75259 | -0.87207 | -0.14983 | P4E0C...0..  | 2.14668  | 0.5542   | 0.63333  | VS3-O...6... | -0.40468 | 0.56293  | 0.2536   |
| (...N...(...  | 0.15902  | 0.10763  | 0.35336  | P4E0C...1..  | 0.24462  | 0.72058  | 0.29022  | VS3-O...7... | -0.98741 | -1.64867 | 0.33362  |
| (...O...(...  | 0.82184  | 1.78373  | -0.54791 | P4E0C...10.. | 0.22733  | 0.59035  | 0.30857  | VS3-O...8... | 0.45968  | -0.05036 | 0.1238   |
| (...S...(...  | 0.43688  | -0.66548 | -0.77689 | P4E0C...11.. | 0.41199  | 0.10301  | 2.08612  | VS3-O...9... | 0.47931  | 0.32063  | 2.21194  |
| (...c...(...  | -0.65237 | -0.95002 | 0.34203  | P4E0C...12.. | -0.95789 | -0.73529 | -0.8173  | VS3-S...11.. | -0.21522 | -0.1671  | -0.37079 |
| (...n...(...  | -0.64142 | 0.14207  | -0.60973 | P4E0C...13.. | -2.41886 | -1.7157  | 5.26181  | VS3-S...14.. | 0.67267  | -0.01185 | 0.31715  |
| ++++F--B2==   | -0.17094 | 0.03729  | 0.20343  | P4E0C...14.. | 0.55185  | 0.10076  | 0.71493  | VS3-S...5... | -0.38243 | -0.89751 | -4.11491 |
| ++++F--Br==   | 0.3266   | 1.92389  | -0.55024 | P4E0C...16.. | 0.45867  | -0.79026 | 0.44333  | VS3-S...7... | 2.34369  | 2.06294  | 0.61945  |
| ++++F--Cl==   | -0.73956 | -0.80405 | -4.08009 | P4E0C...2..  | 0.29135  | 0.36145  | 0.38588  | VS3-S...9... | 0.67812  | 2.27789  | 2.12685  |
| ++++F--N===   | 0.38859  | -0.50174 | 0.09985  | P4E0C...3..  | 0.44616  | -0.02099 | 0.06334  | VS3-o...10.. | -0.75463 | -0.5909  | -1.81098 |
| ++++F--O===   | -0.73131 | 0.07809  | -0.57455 | P4E0C...4..  | 2.48629  | 0.03342  | -0.55966 | VS3-o...11.. | 1.23415  | 0.2942   | 0.48777  |
| ++++CL--Br==  | -1.05343 | -0.87694 | 2.33182  | P4E0C...5..  | 0.27404  | 0.46774  | 0.35529  | VS3-o...6... | -1.03908 | -0.72184 | 0.26856  |
| ++++CL--N===  | 0.23456  | 2.63313  | 1.56877  | P4E0C...6..  | 0.018    | -0.74305 | 0.01379  | VS3-o...7... | 2.28648  | 2.2343   | -0.37584 |
| ++++CL--O===  | 0.43753  | -0.68988 | 1.80939  | P4E0C...7..  | -0.63673 | 0.10287  | -0.79602 | VS3-o...8... | 2.22533  | 2.26262  | 4.13941  |
| ++++CL--S===  | 0.86595  | 2.43523  | 2.14529  | P4E0C...8..  | -0.96375 | -0.64128 | 0.39617  | VS3-s...10.. | 1.09345  | 2.62178  | 0.33592  |

|              |          |          |          |              |          |          |          |              |          |          |          |
|--------------|----------|----------|----------|--------------|----------|----------|----------|--------------|----------|----------|----------|
| ++++Br--B2== | 2.37527  | 0.25558  | -0.21154 | P4E0C...9..  | 0.32094  | 1.10507  | 4.3107   | VS3-s...13.. | -0.0031  | -0.59038 | -0.76978 |
| ++++Br--N=== | 2.24884  | 4.08899  | 0.96627  | P4E0F...1..  | 0.96767  | 0.58998  | -0.00761 | VS3-s...7... | -0.13915 | -1.19964 | -1.16915 |
| ++++Br--O=== | 0.11309  | -0.01002 | 0.42973  | P4E0F...4..  | 0.30015  | -0.65315 | -0.82981 | VS3-s...8... | 2.36114  | 1.21341  | 0.79226  |
| ++++Br--S=== | -0.2528  | 2.36828  | -0.18373 | P4E0Br..1..  | 0.11796  | 0.66855  | 1.97096  | Smax.0.....  | -0.65174 | 2.38818  | 2.24985  |
| ++++Cl--B2== | 0.43461  | 1.16486  | -1.94998 | P4E0Br..4..  | 0.35058  | 0.04477  | -0.06059 | Smax.1.....  | -0.96839 | 0.2477   | 0.13328  |
| ++++N--B2==  | 0.35841  | -0.11485 | -0.70113 | P4E0Cl..1..  | 2.35942  | 2.341    | 0.27932  | [...(.....   | -1.0966  | 0.01273  | -0.71241 |
| ++++N--O===  | 0.44561  | 0.34154  | 0.25014  | P4E0Cl..3..  | 2.41505  | -0.08126 | 2.00445  | [...(1...    | 1.02952  | 0.04978  | 0.40604  |
| ++++N--S===  | -0.8946  | 0.38615  | 0.4292   | P4E0Cl..4..  | 0.05601  | -0.12541 | -0.05891 | [...(=...    | -0.13429 | -0.62889 | -0.69586 |
| ++++O---B2== | 9.81519  | 3.09597  | 2.91522  | P4E0N...0..  | 0.37668  | -0.00893 | 0.3947   | [...(C...    | 2.39029  | 0.25082  | 0.10469  |
| ++++O---S=== | -1.40068 | 0.20301  | 2.36456  | P4E0N...1..  | 2.48464  | -1.06816 | 5.98355  | [...(Cl..    | -0.87323 | -1.19139 | -0.01575 |
| ++++S---B2== | 2.19085  | 0.31217  | 0.22488  | P4E0N...10.. | -4.65723 | -6.50824 | -0.85931 | [...(O...    | -0.48385 | 0.31666  | -0.99257 |
| +.....       | 1.67286  | -1.19767 | 0.52205  | P4E0N...11.. | -0.88866 | 1.96418  | 2.19852  | [...( [...   | 0.4491   | -0.76719 | 0.1567   |
| +...[...(... | -0.60072 | 0.11373  | 0.03231  | P4E0N...14.. | 1.84754  | 2.20428  | -0.21635 | [...+.....   | 0.96181  | 0.40027  | 0.77769  |
| -.....       | 0.44989  | -1.03034 | 0.13861  | P4E0N...2..  | -0.6568  | 0.04832  | 0.07282  | [...+...N... | -0.76928 | -0.0702  | 0.14334  |
| -...[...(... | 2.08527  | -0.9583  | -0.14388 | P4E0N...19.. | 0.28022  | -0.72826 | 0.10619  | [...-.....   | 0.70303  | -1.36904 | -0.50062 |
| /...(.....   | -0.83823 | -0.89966 | 0.39171  | P4E0N...3..  | 0.24438  | 0.12657  | 0.45724  | [...-...O... | -1.26703 | 0.03843  | -0.98681 |
| /.....       | 0.05502  | 1.20005  | 0.27236  | P4E0N...4..  | 0.20327  | 0.05081  | 0.15148  | [.....       | -0.24726 | 0.65877  | 0.02153  |
| /...C...(... | -0.50631 | -0.74746 | 0.03573  | P4E0N...6..  | 0.47103  | 0.18681  | 0.08587  | [...1.....   | 0.24472  | -0.13658 | 2.3841   |
| /...C.../... | 3.88792  | 6.2645   | 2.21355  | P4E0N...7..  | 0.10744  | 1.46848  | -0.67494 | [...1...[... | 0.32922  | 0.95678  | -0.50699 |
| 1...(.....   | -0.88647 | -0.53661 | -0.68198 | P4E0N...8..  | -0.15703 | 0.96519  | 0.30607  | [...H.....   | 2.03667  | 2.42619  | -0.66125 |
| 1...(./...   | -0.16259 | -3.58134 | -0.67786 | P4E0O...0..  | 0.96558  | 2.49588  | 0.48545  | [...N...+... | -0.94203 | -0.5782  | 0.15428  |
| 1.....       | 0.07088  | -0.61258 | -0.725   | P4E0O...1..  | 0.29668  | -0.54945 | -0.41648 | [...N.....   | 0.63144  | -0.67991 | 0.10878  |
| 1./.....     | -0.32414 | 2.36942  | -0.67848 | P4E0O...12.. | 0.00505  | -1.08059 | -1.35653 | [...O...-... | 0.93335  | -1.55038 | -0.87615 |
| 1...C...(... | -0.85724 | 0.13669  | 0.04957  | P4E0O...17.. | -0.61753 | -0.49958 | 1.2498   | [...O.....   | 1.87726  | -0.41672 | -0.30473 |
| 1...C.../... | 2.76418  | 5.36876  | 4.25196  | P4E0O...2..  | -2.44741 | -1.13395 | -2.31766 | [...c...(... | 0.25737  | 0.21632  | 0.02039  |
| 1...F...(... | -0.86333 | -0.99589 | 0.17246  | P4E0O...3..  | 2.46943  | 2.205    | 0.05077  | [...c...1... | 0.47055  | 0.03045  | 0.17797  |
| 1...N...(... | -0.74858 | 0.03961  | 0.02261  | P4E0O...4..  | 0.26542  | 2.42858  | 0.07965  | [...c...2... | 0.41686  | 1.75272  | 0.0331   |
| 1...N...1... | 2.15266  | 1.17634  | -0.04367 | P4E0O...5..  | 0.83243  | -3.29483 | -0.60085 | [...n...+... | 0.76332  | -0.96771 | 0.46612  |
| 1...O...(... | -1.00225 | -1.67247 | -2.04167 | P4E0O...6..  | -0.75685 | 2.13922  | 0.66732  | [...n...1... | -1.24319 | -0.42944 | 0.45575  |
| 1...[...+... | -0.004   | 0.29724  | 0.3169   | P4E0O...7..  | -0.87706 | -0.9081  | -0.72617 | [...n...H... | 1.64934  | 3.16306  | 2.22362  |
| 1...c...(... | 0.16075  | -0.67558 | 0.52334  | P4E0S...1..  | -0.71181 | -1.17581 | -0.02704 | c...(.....   | 0.1953   | 0.34191  | 0.20199  |
| 1...c.../... | 1.40432  | -0.88451 | 1.14304  | P4E0S...2..  | -0.51767 | 0.09598  | 0.45866  | c...(1...    | -0.61214 | -0.22007 | 0.27776  |
| 1...c...1... | 2.10523  | 0.36357  | 0.35747  | P4E0S...3..  | 2.48051  | 2.11862  | 2.57601  | c...(2...    | -0.18695 | -0.07014 | -0.12277 |
| 1...n...(... | -0.35428 | 2.4231   | -0.56348 | P4E0S...4..  | -1.0458  | 1.93728  | 2.05051  | c...(3...    | 0.04127  | -0.82224 | -0.56249 |
| 1...o...(... | 0.31748  | 2.00136  | 2.09789  | P4E0S...8..  | 1.12671  | 0.65838  | 0.57188  | c...(=...    | 0.40026  | 2.36757  | 0.2749   |



|              |          |          |          |              |          |          |          |              |          |          |          |
|--------------|----------|----------|----------|--------------|----------|----------|----------|--------------|----------|----------|----------|
| 1...s...(... | -0.90313 | -0.6556  | -0.40558 | P4E0o...1-.. | 0.05482  | 0.13664  | -0.67764 | c...(C...    | 0.12889  | 0.34374  | 0.29765  |
| 2...(.....   | -0.90852 | 0.31369  | 0.08333  | P4E0o...4-.. | -0.80991 | 0.04825  | -1.19725 | c...(F...    | -2.52888 | -1.61649 | -0.67416 |
| 2.....       | -0.5274  | -0.86885 | 0.67795  | P4E0o...6-.. | -0.59434 | 0.69323  | 0.187    | c...(Br..    | 0.22694  | -0.80887 | -0.41667 |
| 2...1.....   | 1.85686  | -0.21959 | 0.27378  | P4E0s...1-.. | 0.97419  | 2.24934  | 2.19707  | c...(Cl..    | 0.7906   | 0.35256  | 0.21527  |
| 2...C...(... | -0.86324 | -0.40351 | 0.24012  | P4E0s...3-.. | -0.96283 | -0.3138  | 0.02303  | c...(N...    | -0.662   | -0.82765 | -1.05612 |
| 2...N...(... | -1.02514 | -0.67422 | 0.23846  | P4E0s...4-.. | -0.69027 | 2.17271  | 2.3896   | c...(O...    | 0.2473   | 0.22204  | -0.08639 |
| 2...c...(... | 0.3773   | 0.02403  | 0.18298  | P4E0s...7-.. | 0.13307  | 2.72173  | -0.02907 | c...( [...   | 0.62566  | 0.28352  | -0.80651 |
| 2...c...1... | -0.39253 | 0.44184  | -0.95904 | NNC-C...101. | -0.86926 | 0.46532  | 0.35302  | c...(c...    | -1.22698 | -0.18396 | 0.1717   |
| 3...(.....   | 0.0571   | 2.03546  | 0.20848  | NNC-C...110. | 0.18794  | 0.3815   | 0.1367   | c.....       | 0.46657  | 0.22473  | -0.72668 |
| 3.....       | 0.39261  | 2.49457  | -0.96699 | NNC-C...202. | -0.1104  | 2.15913  | -1.65686 | c.../.....   | -0.57584 | -0.87437 | -0.97905 |
| 3...c...(... | -0.285   | -1.31759 | 0.1895   | NNC-C...211. | 0.29566  | 0.4687   | -0.99337 | c.../...C... | 0.10627  | 0.0102   | 0.48779  |
| 3...c...2... | 2.19938  | 2.27641  | 2.44226  | NNC-C...220. | 0.34837  | -0.60713 | -0.98837 | c...1...(... | -0.53693 | 0.34525  | 0.36396  |
| =...(/(...   | 0.17916  | 0.8407   | -0.81229 | NNC-C...303. | 0.10882  | -0.74197 | -0.07094 | c...1.....   | -0.89502 | -0.2754  | 0.10332  |
| =...(.....   | 2.00043  | 0.22534  | -0.27615 | NNC-C...312. | -0.83765 | -2.0144  | -0.62769 | c...1.../... | -0.11257 | -1.43555 | -0.10795 |
| =.....       | -0.50529 | -0.12566 | 0.29799  | NNC-C...321. | -0.66311 | 0.23057  | -0.07606 | c...1...C... | 0.18332  | -0.54648 | 0.35952  |
| =...1.....   | -0.51219 | -0.73271 | -0.59614 | NNC-C...330. | 0.16045  | -0.76882 | 0.40004  | c...1...F... | 2.0851   | 0.42901  | 0.19697  |
| =...1.../... | 3.17531  | 3.11667  | 0.96217  | NNC-C...431. | -0.45392 | 1.24047  | 0.86411  | c...1...Cl.. | -0.78004 | 0.60495  | -0.03166 |
| =...2.....   | 0.02286  | 0.1147   | 0.37688  | NNC-C...440. | -0.11586 | 0.09651  | -0.87779 | c...1...N... | 0.10738  | -0.29957 | 0.44791  |
| =...C...(... | 0.18903  | -0.83172 | 0.45762  | NNC-F...110. | 0.07713  | 0.38434  | -0.09156 | c...1...O... | -0.79468 | 1.39457  | 1.76251  |
| =...C.../... | 0.00465  | 0.05207  | 0.10391  | NNC-Br..110. | -0.379   | 0.35119  | 2.28732  | c...1...[... | 0.01558  | -0.90761 | 0.30787  |
| =...C...1... | -0.61969 | 2.17023  | -0.70744 | NNC-Cl..110. | 2.06333  | -0.97848 | 0.47346  | c...1...c... | 2.50818  | -0.40877 | 1.57451  |
| =...N...1... | 2.4587   | 2.14589  | 0.13007  | NNC-N...110. | 0.71814  | 0.45894  | 0.47176  | c...2...(... | -1.10755 | -1.38383 | -0.65953 |
| =...O...(... | -0.62459 | 0.3553   | -0.7415  | NNC-N...202. | 0.00705  | -0.66602 | 0.04196  | c...2.....   | 0.21551  | 0.24342  | 0.0387   |
| =...S...(... | -1.79484 | -0.75151 | 0.15707  | NNC-N...211. | 0.31195  | 1.13424  | 1.81994  | c...2...N... | 0.46157  | 1.76916  | -0.65821 |
| =...c...1... | 0.02464  | 2.29257  | 2.11159  | NNC-N...220. | -0.66974 | -0.8078  | -0.98823 | c...2...S... | -0.16766 | 0.28641  | 0.64209  |
| C...(/(...   | 1.95069  | -0.34839 | -1.19131 | NNC-N...312. | 0.19204  | -0.79718 | 0.43308  | c...2...c... | 0.19636  | 1.02119  | 0.31959  |
| C...(.....   | 0.07378  | 0.16918  | -0.50665 | NNC-N...321. | -0.86984 | 2.30817  | 0.00336  | c...3...(... | 0.26843  | -0.46684 | 0.27931  |
| C...(1...    | 1.04086  | -0.98564 | -0.63982 | NNC-N...330. | 0.30766  | -0.59293 | -0.51872 | c...3.....   | 0.19527  | 0.32395  | -0.4619  |
| C...(2...    | -0.67466 | 0.31276  | 0.42574  | NNC-O...101. | 0.16806  | 0.58649  | 0.03415  | c...3...c... | 0.23613  | 0.8947   | 0.8148   |
| C...(=...    | 0.26702  | 0.05664  | 0.15041  | NNC-O...110. | 0.03442  | 0.38546  | 0.16771  | c...=.....   | 2.4395   | 2.00253  | 0.29406  |
| C...(C...    | -0.90784 | -0.88757 | -0.79176 | NNC-O...211. | -0.68848 | 2.18022  | 0.31477  | c...=...O... | 0.59099  | 2.04356  | 0.2964   |
| C.....       | -0.34185 | 0.29935  | 0.33058  | NNC-O...220. | 0.40266  | 0.08823  | 0.23473  | c...C...(... | -0.04656 | 0.23988  | -0.88547 |
| C.../...(... | -0.64642 | 0.4721   | 0.41573  | NNC-S...110. | -0.76334 | -1.53804 | -0.51769 | c...C.....   | -0.89937 | -0.625   | -1.90407 |
| C.../.....   | 0.20068  | 0.16103  | 0.30284  | NNC-S...220. | 1.16885  | -0.0663  | -0.4239  | c...C...=... | 0.03385  | 0.18785  | 2.1896   |
| C.../...1... | 2.36295  | 0.38239  | 0.42433  | NNC-S...422. | -0.19277 | -0.58935 | -0.64545 | c...C...C... | 0.17079  | 0.03768  | 0.35625  |

|              |          |          |          |               |          |          |          |              |          |          |          |
|--------------|----------|----------|----------|---------------|----------|----------|----------|--------------|----------|----------|----------|
| C.../...C... | 2.10623  | 2.0365   | 2.02892  | NNC-o...202.  | 2.4279   | 1.94307  | 2.01394  | c...C...N... | -0.86701 | -0.53823 | 0.13051  |
| C...1...(... | -0.97274 | 0.13768  | 0.00356  | NNC-o...220.  | 0.1473   | 0.06279  | -0.10031 | c...Br.....  | 0.23751  | 2.30103  | 0.32032  |
| C...1.....   | -0.75828 | -0.51664 | 0.01672  | NNC-s...211.  | -2.11884 | 0.09773  | -0.84484 | c...Cl.....  | 1.45553  | 0.40118  | 2.05023  |
| C...1...2... | 0.08797  | -1.12669 | -0.76194 | NNC-s...220.  | 0.6417   | 0.18143  | 0.06217  | c...N...(... | -0.5498  | -0.66668 | 0.00382  |
| C...1...=... | -0.68124 | -0.75235 | -0.91031 | NNE0C...100-  | 0.43544  | 0.31653  | -0.14967 | c...N.....   | 1.16731  | 0.89965  | 0.49555  |
| C...1...C... | -0.7043  | -0.50412 | 0.64943  | NNE0C...109-  | 0.28397  | 0.25125  | 0.00228  | c...N...C... | 2.92353  | 4.25079  | 2.60784  |
| C...2...(... | -0.5212  | -1.13793 | -1.86752 | NNE0C...200-  | 0.20143  | 0.29759  | -3.5796  | c...O...(... | 0.73589  | 2.14251  | 1.54193  |
| C...2.....   | 0.32483  | 0.44429  | -0.1242  | NNE0C...209-  | 0.09526  | 0.60817  | -0.43311 | c...O.....   | 1.15472  | 0.2555   | 0.33635  |
| C...2...1... | 1.05468  | -0.7895  | 0.11158  | NNE0C...218-  | -0.98264 | 0.36865  | 0.35168  | c...O...C... | 0.16313  | 0.06093  | -1.21975 |
| C...2...=... | -0.28275 | 0.00365  | 1.0386   | NNE0C...300-  | 0.07878  | -2.45935 | 0.39818  | c...S...(... | 0.02161  | -0.58077 | 0.84609  |
| C...=.....   | 0.41209  | -0.75252 | -0.08592 | NNE0C...309-  | -0.90927 | -1.61    | -0.27437 | c...S.....   | 2.26579  | 1.03023  | 0.92434  |
| C...=...1... | 4.3505   | 4.34479  | 2.02303  | NNE0C...318-  | -0.04826 | 0.07932  | 0.201    | c...S...2... | 0.1431   | -0.879   | 0.06885  |
| C...=...C... | 0.39112  | -0.77384 | 0.0655   | NNE0C...327-  | 0.21792  | 0.13119  | 0.49386  | c...S...C... | -0.14126 | 2.44354  | -0.22904 |
| C...C...(... | 2.01924  | -0.6994  | 0.56604  | NNE0C...427-  | 0.20733  | -0.38507 | -0.96952 | c...[.....   | 1.27242  | 0.68466  | -0.41111 |
| C...C.....   | 0.20575  | 0.43321  | -0.7029  | NNE0C...436-  | 0.21199  | -1.41774 | 0.24747  | c...[...H... | -0.61421 | 0.77017  | 0.12073  |
| C...C...1... | 0.3154   | -0.20764 | 0.04377  | NNE0F...109-  | 0.18091  | 0.05785  | 0.21238  | c...c...(... | 0.42382  | -0.99522 | 1.6158   |
| C...C...2... | 0.55175  | -0.43335 | 0.20573  | NNE0Br...109- | 2.46206  | 0.67419  | -0.70048 | c...c.....   | -0.04669 | 0.23266  | 0.32142  |
| C...C...C... | 1.1372   | 0.31272  | 2.39649  | NNE0Cl...109- | 0.62893  | 0.41625  | 2.28584  | c...c...1... | 0.3507   | 0.10477  | 0.06463  |
| C...N...(... | 0.21159  | 0.12956  | 0.18688  | NNE0N...109-  | 0.0339   | -0.02116 | 0.18898  | c...c...2... | -0.54621 | -0.49141 | 0.46109  |
| C...N...1... | 0.2874   | 0.35752  | 2.17388  | NNE0N...200-  | 0.01366  | 0.10617  | -0.90256 | c...c...3... | -0.74216 | 0.46357  | -0.62553 |
| C...O...(... | -5.68116 | -6.70564 | 1.72868  | NNE0N...209-  | 0.00871  | 0.47824  | -2.09162 | c...c...c... | 0.1058   | 0.26534  | 0.36522  |
| C...O...1... | 1.93896  | 0.79554  | 2.03953  | NNE0N...218-  | 0.28302  | 0.36865  | 1.08104  | c...n...(... | 1.16746  | 0.39569  | -0.18389 |
| C...O...C... | 0.29453  | 0.01557  | 0.13904  | NNE0N...309-  | -0.97543 | 0.09656  | -0.7825  | c...n...1... | -2.10713 | 4.28496  | 1.66834  |
| C...c...1... | -0.7493  | -1.53913 | -1.27585 | NNE0N...318-  | -0.12177 | 0.23342  | 0.028    | c...n...2... | -0.96262 | 1.04851  | 3.86992  |
| C...c...2... | -1.02529 | -0.62673 | 1.28328  | NNE0N...327-  | -0.12648 | -0.56638 | -0.0378  | c...n...c... | -0.72699 | -0.66037 | 0.39434  |
| C...n...1... | 1.49629  | -0.67762 | -0.20629 | NNE0O...100-  | -0.60127 | 0.33773  | 0.25543  | c...o...(... | 2.25921  | -0.40242 | 1.55161  |
| C...n...2... | 2.01962  | 1.44106  | 0.03057  | NNE0O...109-  | -0.98031 | -0.95069 | 0.47431  | c...o...1... | 2.30479  | 0.03787  | 0.12458  |
| C3.....0...  | -0.07348 | 0.34884  | 0.00428  | NNE0O...209-  | 0.34908  | -0.52632 | 0.11329  | c...s...(... | 2.59816  | 0.43682  | 0.90332  |
| C3.....1...  | 0.14705  | -0.46933 | -0.46993 | NNE0O...218-  | 0.46082  | 1.13791  | 2.18936  | c...s...1... | 2.4677   | 0.66417  | -0.0726  |
| C4.....0...  | 3.602    | 11.72941 | 3.09033  | NNE0S...109-  | 0.05449  | 1.22209  | 1.14156  | e0p2C...10+. | -0.98367 | 0.33033  | 0.07837  |
| C5.....0...  | -0.82982 | -0.29485 | 0.41935  | NNE0S...218-  | 0.37393  | 0.03671  | 0.47469  | e0p2C...2+.. | 0.37127  | 0.40796  | 0.29215  |
| C5...H.1...  | 2.23096  | 2.39791  | 0.20912  | NNE0S...418-  | -0.6873  | -0.65093 | 0.34951  | e0p2C...3+.. | 0.38681  | 0.00071  | 0.39758  |
| C5...AH.1... | 0.38216  | 0.99333  | 2.35586  | NNE0o...200-  | 1.10553  | -0.06943 | 2.378    | e0p2C...4+.. | 0.50348  | 0.31072  | 0.03007  |
| C5...AH.2... | -0.93606 | 2.44025  | 0.55019  | NNE0o...218-  | 0.11692  | 0.34336  | -0.25037 | e0p2C...5+.. | 0.16947  | 0.39067  | 0.35187  |
| C5...AH.3... | 0.00653  | 0.5043   | 2.65781  | NNE0s...209-  | -0.59589 | -0.66657 | -1.07883 | e0p2C...6+.. | -0.16898 | -1.13692 | 0.25471  |

|              |          |          |          |              |          |          |          |              |          |          |          |
|--------------|----------|----------|----------|--------------|----------|----------|----------|--------------|----------|----------|----------|
| C5...AH.4... | 0.04788  | -1.39568 | 0.30511  | NNE0s...218- | 0.50658  | 1.80583  | 0.26503  | e0p2C...7+.. | -0.90503 | -0.33459 | -0.79651 |
| C6...A.1...  | 2.4762   | 1.00333  | 2.0262   | NOSP01000000 | 2.5344   | 2.26508  | 2.09409  | e0p2C...8+.. | 0.35126  | 0.1937   | 0.29961  |
| C6...A.2...  | 0.43189  | -0.60394 | -0.04285 | NOSP11000000 | 0.14629  | -0.00026 | -0.37188 | e0p2C...9+.. | 0.47028  | -0.74418 | -0.56795 |
| C6...A.3...  | 0.06843  | 0.1297   | 0.44534  | NOSP11100000 | 0.54586  | -0.03458 | 0.38508  | e0p2F...3+.. | -0.87927 | -0.8286  | 0.03548  |
| C6...AH.1... | 1.90853  | 2.45237  | -0.08229 | S...(.....   | -0.62405 | 0.27505  | 0.25545  | e0p2Br..3+.. | -0.00341 | 2.22515  | 0.36547  |
| C6...AH.2... | 0.22575  | 2.11604  | 0.3301   | S...(..2...  | 0.33015  | -0.22048 | -0.72353 | e0p2Cl..2+.. | 1.01898  | 0.42033  | 0.21312  |
| C6...AH.3... | 2.29352  | 3.45933  | 1.33779  | S...(..=...  | 0.13132  | 0.38595  | 0.26522  | e0p2Cl..3+.. | 0.19309  | 0.36027  | 0.48552  |
| C6...AH.4... | -0.58423 | -0.65674 | 0.01364  | S...(..N...  | 0.15048  | -0.65508 | -0.72451 | e0p3C...10+. | 0.16421  | 0.29972  | 0.43544  |
| C7.....0...  | -0.85599 | -0.56394 | 0.13595  | S.....       | 1.83762  | -0.67406 | -0.44233 | e0p3C...11+. | -0.75537 | 0.04986  | 0.03745  |
| C7...AH.1... | 2.05792  | 2.11567  | 2.34779  | S...2.....   | 0.45071  | -1.08358 | 0.43058  | e0p3C...12+. | -0.24449 | -1.17819 | 0.58026  |
| BOND10000000 | 8.94516  | 13.08141 | 7.22376  | S...=...(... | -0.7299  | -1.18065 | 0.08055  | e0p3C...2+.. | 2.09813  | -0.20332 | 0.07296  |
| F...(.....   | 1.43475  | 0.44097  | -0.60948 | S...=.....   | -1.21615 | -1.23608 | 1.31501  | e0p3C...3+.. | -0.79104 | -0.90227 | -1.93901 |
| F...(..1...  | -1.10819 | 1.00846  | 1.98984  | S...C...(... | -0.0365  | -1.0653  | 0.25882  | e0p3C...4+.. | 0.42671  | 2.45642  | 2.32459  |
| F...(..C...  | 0.47876  | 0.26678  | -0.58958 | S...C.....   | 2.14435  | 0.46364  | -1.04551 | e0p3C...5+.. | 1.4262   | -0.8832  | 0.44245  |
| F.....       | 0.29933  | 0.16608  | -0.86299 | S...c...1... | 0.43744  | 2.03133  | 0.45472  | e0p3C...6+.. | 0.15693  | -0.1278  | 0.00525  |
| F...1.....   | -0.65676 | -0.60761 | 0.39989  | S...c...2... | 0.43679  | 0.34424  | 0.08513  | e0p3C...7+.. | 0.18454  | 0.40036  | -0.80382 |
| EC0-C...1... | 1.33343  | -0.70168 | 2.08608  | S2E0C...0-.. | -0.9488  | -0.00354 | -1.33226 | e0p3C...8+.. | 0.24701  | -1.85041 | 0.35201  |
| EC0-C...2... | -0.98473 | -0.68768 | -0.20758 | S2E0C...1-.. | 2.31282  | 6.23914  | 2.97568  | e0p3C...9+.. | -0.76679 | 0.38658  | 0.0833   |
| EC0-C...3... | -0.87435 | -0.88187 | -0.90917 | S2E0C...10-. | -5.06072 | -5.46312 | -0.47685 | e0p2N...3+.. | 0.11205  | -0.02944 | -0.07326 |
| EC0-C...4... | -0.8675  | 0.19865  | -0.85571 | S2E0C...11-. | 0.16594  | 0.29054  | -0.12335 | e0p2N...4+.. | 0.39551  | 0.353    | 0.32006  |
| EC0-F...1... | 0.19472  | -0.55014 | 0.15879  | S2E0C...12-. | 0.04335  | -1.19084 | -0.93333 | e0p2N...5+.. | 0.08597  | 0.05157  | -0.50184 |
| EC0-Br..1... | 0.20512  | -0.26029 | -0.72634 | S2E0C...2-.. | 0.42085  | -0.31668 | 2.1276   | e0p2N...6+.. | -0.68083 | 0.08408  | 0.04001  |
| EC0-Cl..1... | -0.32422 | 0.13405  | 2.59179  | S2E0C...3-.. | 0.17811  | -0.00932 | 0.0573   | e0p2N...7+.. | -0.11474 | 2.53325  | -0.2959  |
| EC0-N...1... | 0.14209  | 0.12488  | 0.43858  | S2E0C...4-.. | 0.13606  | 0.01125  | 0.40397  | e0p2N...8+.. | -0.44746 | -0.90497 | 0.09984  |
| EC0-N...2... | -0.84074 | -0.60677 | -0.35414 | S2E0C...5-.. | -0.60074 | 0.2755   | 2.29755  | e0p2N...9+.. | 0.07307  | -0.23109 | 0.19375  |
| EC0-N...3... | 0.38067  | 0.60143  | 0.21184  | S2E0C...6-.. | -0.9074  | 0.28149  | 0.04225  | e0p2O...3+.. | 0.1273   | 0.22243  | 0.34022  |
| EC0-O...1... | -0.71622 | -0.95598 | 0.04938  | S2E0C...7-.. | -0.2164  | -0.03672 | -0.66301 | e0p2O...4+.. | -0.69941 | 0.32864  | -1.40181 |
| EC0-O...2... | -0.06109 | 0.29033  | 0.00625  | S2E0C...8-.. | 0.96579  | 1.36538  | 0.0826   | e0p2O...5+.. | 2.02372  | -0.22981 | 0.60765  |
| EC0-S...1... | 0.47602  | -1.6274  | 0.26981  | S2E0C...9-.. | 2.25172  | -0.44344 | 0.11377  | e0p2O...6+.. | 0.33552  | 2.0109   | 0.90787  |
| EC0-S...2... | 2.0542   | -0.08174 | -0.98529 | S2E0F...3-.. | 1.08831  | 0.05615  | 0.31335  | e0p3F...3+.. | 0.44658  | -0.64833 | -0.06288 |
| EC0-S...4... | -0.01906 | 0.41285  | -0.19033 | S2E0F...4-.. | 0.26835  | 0.00349  | 0.02775  | e0p3F...4+.. | 0.41845  | 2.14268  | -0.21173 |
| EC0-o...2... | 2.10864  | 2.23249  | 2.45933  | S2E0Br..3-.. | 0.09339  | 2.26231  | 0.37357  | e0p3Br..3+.. | 0.11007  | 0.28505  | 0.4095   |
| EC0-s...2... | 0.13433  | 2.4597   | 0.56522  | S2E0Br..4-.. | -0.25068 | -0.20585 | 0.0372   | e0p3Br..4+.. | 0.29975  | 0.53297  | 0.04254  |
| EC2-C...10.. | 0.3599   | -0.63413 | -0.76609 | S2E0Cl..2-.. | 0.06502  | 0.06627  | 0.06008  | e0p2S...3+.. | 0.46139  | -0.04694 | 0.4675   |
| EC2-C...11.. | 0.30712  | 0.03521  | -0.28346 | S2E0Cl..3-.. | 0.13676  | 2.13808  | 0.32001  | e0p2S...4+.. | 2.07078  | 0.12752  | -0.24984 |

|              |          |          |          |              |          |          |          |              |          |          |          |
|--------------|----------|----------|----------|--------------|----------|----------|----------|--------------|----------|----------|----------|
| EC2-C...12.. | 0.00033  | -0.76009 | 2.12283  | S2E0Cl..4..  | -0.70208 | 1.8671   | -0.48406 | e0p2S...5+.. | 2.44121  | 0.52853  | 0.89321  |
| EC2-C...13.. | 0.33338  | -0.04111 | 0.48041  | S2E0N...1-.. | 6.24307  | 3.78681  | 3.91207  | e0p2S...6+.. | -0.24904 | 0.37784  | -0.98852 |
| EC2-C...14.. | -0.34939 | -0.72404 | 0.04791  | S2E0N...10-. | 2.02773  | -0.6006  | 1.98448  | e0p3Cl..3+.. | 0.27937  | 2.38474  | 0.11486  |
| EC2-C...15.. | 0.30144  | -0.19674 | 0.25587  | S2E0N...11-. | 2.10953  | 2.25836  | 2.27513  | e0p3Cl..4+.. | -0.82964 | -0.85447 | -0.93016 |
| EC2-C...16.. | -0.08983 | 0.40038  | 2.07207  | S2E0N...2-.. | -0.09317 | 0.24945  | -0.84046 | e0p4C...10+. | -0.28932 | -0.93674 | 0.30068  |
| EC2-C...17.. | 0.10856  | 0.21782  | -0.79792 | S2E0N...3-.. | 0.05544  | 0.37314  | 0.14471  | e0p4C...11+. | 0.1568   | -0.97157 | -0.8397  |
| EC2-C...18.. | 0.31104  | -0.62373 | -0.15577 | S2E0N...4-.. | 0.13761  | 0.2976   | -0.35338 | e0p4C...12+. | -0.03671 | 0.09639  | 0.45011  |
| EC2-C...19.. | 0.19026  | -0.66914 | 2.34399  | S2E0N...5-.. | 0.16214  | 0.74659  | -0.89861 | e0p4C...13+. | -1.00517 | 0.26568  | 0.08997  |
| EC2-C...20.. | 1.09592  | 2.2709   | 3.2232   | S2E0N...6-.. | 0.34923  | 0.30188  | 1.31896  | e0p4C...14+. | 0.45916  | 0.08039  | 0.43001  |
| EC2-C...21.. | 0.35105  | 0.05018  | 2.03222  | S2E0N...7-.. | -0.66176 | 0.22509  | 0.00713  | e0p4C...15+. | 1.05147  | 1.27611  | -0.29916 |
| EC2-C...22.. | 0.43326  | -0.77189 | -2.29108 | S2E0N...8-.. | -0.99615 | -0.94914 | -1.08996 | e0p4C...2+.. | 0.32808  | 3.36571  | 2.59167  |
| EC2-C...23.. | 0.42687  | 0.31068  | 2.44792  | S2E0N...9-.. | -0.76624 | -0.51912 | -0.44635 | e0p4C...16+. | 0.19386  | 2.21319  | -0.54969 |
| EC2-C...24.. | -0.73815 | 0.41025  | -1.3745  | S2E0O...1-.. | -1.63806 | -3.05344 | -1.56584 | e0p4C...17+. | 0.06058  | -0.73189 | 0.37443  |
| EC2-C...27.. | -1.44568 | -0.55078 | -0.31158 | S2E0O...2-.. | 0.08999  | 2.48075  | 0.21804  | e0p4C...18+. | 0.22288  | 0.01934  | 0.04174  |
| EC2-C...3... | -1.10568 | 0.01758  | -0.83064 | S2E0O...3-.. | 1.34389  | 1.21962  | -0.10065 | e0p4C...19+. | -1.08278 | -0.35982 | -0.11231 |
| EC2-C...29.. | 0.9315   | -3.77907 | 2.61219  | S2E0O...4-.. | -0.76162 | -0.58262 | -0.26656 | e0p4C...20+. | -0.86387 | 0.27893  | -0.52123 |
| EC2-C...4... | 0.42323  | 0.42259  | 0.45162  | S2E0O...5-.. | 1.25961  | 0.24229  | -0.96355 | e0p4C...21+. | -0.37466 | 0.52262  | 1.84969  |
| EC2-C...5... | 0.26041  | 0.47713  | 0.24698  | S2E0O...6-.. | 0.41921  | 0.10723  | 0.04183  | e0p4C...3+.. | -0.80704 | -0.90485 | -0.24486 |
| EC2-C...6... | 0.28932  | 0.13851  | 0.49066  | S2E0O...7-.. | 0.13022  | -0.74773 | -0.93139 | e0p4C...4+.. | -0.66889 | 2.22512  | 0.10584  |
| EC2-C...7... | 0.35682  | 0.14855  | -0.52433 | S2E0S...0-.. | 0.771    | -0.22161 | -0.04317 | e0p4C...5+.. | 0.46566  | -0.05193 | 1.37894  |
| EC2-C...8... | 2.2569   | 2.05776  | 2.20267  | S2E0S...3-.. | 0.35104  | 1.42147  | -0.73673 | e0p4C...6+.. | 0.14062  | 0.72633  | 0.15469  |
| EC2-C...9... | -0.55987 | 0.35133  | 0.43636  | S2E0S...5-.. | 2.21948  | 2.112    | 2.42632  | e0p4C...7+.. | 0.43342  | 0.16473  | 0.43935  |
| EC2-F...5... | -0.42596 | -0.57238 | 0.98744  | S2E0S...6-.. | 0.31052  | 0.18841  | 0.09618  | e0p4C...8+.. | 0.22762  | 2.22979  | -0.18437 |
| EC2-F...6... | -0.51393 | 0.06646  | 0.15025  | S2E0S...8-.. | -0.66793 | -1.11753 | 0.3575   | e0p4C...9+.. | 0.01658  | 0.12005  | 0.28689  |
| EC2-Br..5... | -0.48756 | 1.4495   | 2.32549  | S2E0o...4-.. | 0.39317  | -0.50288 | 0.22965  | e0p3N...10+. | -0.60725 | 0.03983  | -0.27227 |
| EC2-Br..6... | -0.24792 | -0.66485 | 0.08141  | S2E0o...5-.. | 1.19693  | -0.53672 | 0.45496  | e0p3N...11+. | 2.27325  | 2.14237  | -0.86853 |
| EC2-Cl..4... | 0.24725  | -0.17781 | -0.86642 | S2E0o...6-.. | 2.38456  | 2.13563  | -1.27909 | e0p3N...2+.. | 0.31712  | 1.07352  | 0.59467  |
| EC2-Cl..5... | 1.50158  | 0.85005  | 2.22015  | S2E0s...3-.. | -0.74884 | -0.87493 | -0.97014 | e0p3N...4+.. | 0.80155  | 0.5327   | -0.26267 |
| EC2-Cl..6... | -0.95706 | 0.00598  | -0.1373  | S2E0s...5-.. | -0.25131 | 3.74403  | -0.40257 | e0p3N...5+.. | 0.00814  | -1.06205 | -0.00042 |
| EC2-N...10.. | 0.39626  | 0.07774  | 0.1163   | S2E0s...7-.. | -0.73317 | 2.15717  | -0.53475 | e0p3N...6+.. | 0.3688   | 0.44278  | 0.08182  |
| EC2-N...11.. | 0.4828   | -0.99913 | 0.10551  | S3E0C...0-.. | 1.65408  | -0.99338 | -0.70228 | e0p3N...7+.. | 0.46442  | 0.39812  | 0.36069  |
| EC2-N...12.. | 0.17004  | -0.54882 | 0.41366  | S3E0C...1-.. | 0.00706  | -0.69701 | 0.17743  | e0p3N...8+.. | 0.44597  | 2.22745  | 0.36548  |
| EC2-N...13.. | 0.11085  | 2.03085  | 2.09426  | S3E0C...10-. | 0.03027  | 2.41532  | -0.4291  | e0p3N...9+.. | 0.28095  | -0.65854 | -0.37134 |
| EC2-N...14.. | -0.80067 | -0.95777 | -0.90678 | S3E0C...11-. | 0.02106  | 0.60885  | -0.67114 | e0p3O...2+.. | 0.32396  | -0.21099 | 0.43265  |
| EC2-N...15.. | 2.3234   | -0.67061 | 2.17642  | S3E0C...12-. | -0.01538 | -0.04595 | -0.16313 | e0p3O...3+.. | -0.14387 | -0.36005 | 0.68422  |

|              |          |          |          |              |          |          |          |               |          |          |          |
|--------------|----------|----------|----------|--------------|----------|----------|----------|---------------|----------|----------|----------|
| EC2-N...16.. | -0.18898 | -2.34796 | -2.95272 | S3E0C...13-  | 0.04631  | 0.25024  | 0.21969  | e0p3O...4+..  | 0.21481  | -0.27713 | -0.65819 |
| EC2-N...17.. | -0.53355 | 0.15998  | -0.52331 | S3E0C...14-  | 0.0049   | 0.30456  | 2.18695  | e0p3O...5+..  | 2.41161  | 2.38951  | 2.2488   |
| EC2-N...18.. | 2.26421  | 0.01972  | 0.0142   | S3E0C...15-  | -1.45349 | 0.05894  | 0.0316   | e0p3O...6+..  | 1.53163  | 0.95085  | 2.23071  |
| EC2-N...19.. | 0.17887  | -0.93194 | 0.06661  | S3E0C...16-  | 2.11956  | 2.33775  | 0.39911  | e0p3O...7+..  | 0.43958  | 0.35097  | 0.46445  |
| EC2-N...20.. | -1.7961  | -2.63789 | -0.91104 | S3E0C...17-  | -1.5826  | -0.60645 | -0.62827 | e0p4F...3+..  | -0.57297 | -0.95209 | 0.29743  |
| EC2-N...21.. | 0.71265  | -0.27914 | 0.58549  | S3E0C...2..  | 0.27429  | 2.52373  | 1.68185  | e0p4F...6+..  | 0.18295  | 0.49407  | 0.2457   |
| EC2-N...22.. | 0.05464  | -0.77245 | -0.82946 | S3E0C...3..  | 0.47348  | 0.35625  | 0.38625  | e0p4Br...3+.. | 0.36314  | 0.0541   | 2.4347   |
| EC2-N...23.. | 3.37699  | 1.8545   | 0.16687  | S3E0C...4..  | -0.93473 | -0.61452 | 1.3293   | e0p4Br...6+.. | 0.06727  | 0.31814  | 0.0778   |
| EC2-N...4... | -0.03328 | 0.25868  | -0.71803 | S3E0C...5..  | 0.1353   | 0.33032  | 0.40759  | e0p3S...3+..  | -1.07194 | -1.38599 | -0.8003  |
| EC2-N...9... | 0.13378  | -0.83364 | -0.58222 | S3E0C...6..  | 0.1197   | 0.30557  | 1.11043  | e0p3S...5+..  | 2.45806  | 2.25649  | -0.33346 |
| EC2-O...10.. | -0.97934 | 0.10397  | 0.05953  | S3E0C...7..  | 0.03894  | 0.43282  | 0.27864  | e0p3S...6+..  | -0.90629 | 0.87647  | 0.01443  |
| EC2-O...11.. | 0.22069  | 2.11239  | 1.27346  | S3E0C...8..  | 0.135    | -0.57563 | 0.41162  | e0p3S...8+..  | -0.87719 | 0.32612  | 0.1414   |
| EC2-O...12.. | 1.02826  | 2.3615   | 0.12485  | S3E0C...9..  | 0.23201  | 0.49088  | 0.37742  | e0p4Cl...3+.. | -0.11666 | 2.38107  | 0.18685  |
| EC2-O...13.. | 0.17976  | -1.7382  | 1.19929  | S3E0F...3..  | -0.43814 | -0.70003 | 0.05208  | e0p4Cl...5+.. | 0.85198  | 0.24658  | 2.28072  |
| EC2-O...4... | 0.19638  | -1.44827 | 0.17604  | S3E0F...4..  | -0.2098  | -0.89458 | 0.33557  | e0p4Cl...6+.. | 0.55636  | 0.49357  | -0.71496 |
| EC2-O...5... | -0.50469 | -0.73846 | 0.02202  | S3E0F...5..  | 2.33545  | 2.42237  | -0.04077 | e0p4N...10+   | 0.31179  | 0.06563  | 0.34973  |
| EC2-O...6... | -0.98201 | 0.13757  | 0.14343  | S3E0F...6..  | 0.48171  | -0.69144 | 1.40917  | e0p4N...11+   | 3.18838  | 0.91422  | 0.30805  |
| EC2-O...7... | 1.03562  | 2.15881  | 0.17717  | S3E0Br...3.. | 6.6247   | 4.51131  | 2.52368  | e0p4N...12+   | 0.30572  | 0.42111  | 0.26418  |
| EC2-O...8... | -0.42132 | -2.60232 | -0.90195 | S3E0Br...4.. | 0.04908  | 0.4982   | 0.09559  | e0p4N...13+   | 1.12347  | 0.80565  | 0.10728  |
| EC2-O...9... | 5.99516  | 1.7481   | 2.04759  | S3E0Cl...2.. | 0.10799  | -0.64032 | -0.16994 | e0p4N...14+   | -0.36079 | 1.17982  | 0.06922  |
| EC2-S...11.. | -0.53704 | 2.26223  | 0.30132  | S3E0Cl...3.. | 0.47196  | 0.33385  | 0.88396  | e0p4N...15+   | 2.49267  | 0.4944   | 0.13954  |
| EC2-S...12.. | 2.24782  | 1.19841  | 0.23536  | S3E0Cl...4.. | -0.75885 | -0.25885 | 0.59294  | e0p4N...2+..  | 0.62504  | 0.24561  | 0.26561  |
| EC2-S...14.. | 1.06539  | -0.86593 | 0.12266  | S3E0Cl...5.. | -0.12274 | 1.43134  | -0.30097 | e0p4N...16+   | -0.6862  | -1.43304 | 0.25758  |
| EC2-S...20.. | 1.20331  | 0.56386  | 0.49351  | S3E0Cl...6.. | -0.00565 | -0.61346 | 0.84022  | e0p4N...17+   | 0.10851  | 0.11799  | 2.33664  |
| EC2-S...5... | -0.26735 | -0.78173 | -0.42607 | S3E0N...0..  | -0.46347 | 0.07602  | -1.02237 | e0p4N...18+   | 2.1519   | 0.06572  | 0.10984  |
| EC2-S...9... | 2.40698  | 1.69205  | 0.14614  | S3E0N...1..  | 0.42184  | 2.07231  | 0.04992  | e0p4N...25+   | -0.71977 | -0.92102 | -0.64886 |
| EC2-o...10.. | -0.56314 | 0.04727  | 2.37138  | S3E0N...10-  | 0.43502  | 0.14057  | 0.04204  | e0p4N...4+..  | 0.5507   | -0.86947 | 0.52674  |
| EC2-o...11.. | 0.21401  | -0.83843 | 2.47561  | S3E0N...11-  | -0.96838 | 0.39442  | 0.09411  | e0p4N...5+..  | -1.64714 | 3.08866  | 0.12504  |
| EC2-o...12.. | 2.16656  | 1.76217  | 0.14536  | S3E0N...12-  | 2.73052  | 2.94486  | 2.90888  | e0p4N...6+..  | 1.49589  | 6.30859  | 2.3778   |
| EC2-s...11.. | 3.13425  | 1.63576  | 0.36096  | S3E0N...13-  | 0.06766  | 0.4785   | 1.03017  | e0p4N...7+..  | -0.83049 | -2.56436 | 0.34369  |
| EC2-s...13.. | -0.90932 | -0.84778 | 0.05746  | S3E0N...14-  | -0.2887  | 0.37037  | 0.03548  | e0p4N...8+..  | 0.0761   | -0.86339 | 0.33023  |
| EC2-s...9... | -0.55745 | -1.26584 | 1.1121   | S3E0N...16-  | 0.43087  | 2.41078  | -0.04552 | e0p4N...9+..  | 0.07336  | -0.99221 | 0.54163  |
| EC3-C...10.. | 2.4474   | 2.53105  | 2.31054  | S3E0N...2..  | 0.37683  | -0.18076 | -0.01571 | e0p4O...10+   | 1.38443  | 1.0253   | 0.16581  |
| EC3-C...12.. | -0.94498 | 0.33457  | -0.4771  | S3E0N...18-  | 0.03508  | 0.44157  | 0.27144  | e0p4O...11+   | -2.10859 | -2.48132 | -2.18511 |
| EC3-C...13.. | -1.70415 | -4.68511 | -2.95646 | S3E0N...3..  | -0.48186 | -0.97315 | -0.6514  | e0p4O...14+   | -0.90007 | -1.03009 | 0.30624  |

|              |          |          |          |              |          |          |          |              |          |          |          |
|--------------|----------|----------|----------|--------------|----------|----------|----------|--------------|----------|----------|----------|
| EC3-C...14.. | 1.49585  | -0.91963 | 0.33671  | S3E0N...4-.. | 0.31074  | -0.72514 | 0.35025  | e0p4O...2+.. | 0.16312  | -0.49995 | 2.37527  |
| EC3-C...15.. | 0.13832  | -0.53318 | 0.06897  | S3E0N...5-.. | 0.26551  | -0.47349 | -0.05424 | e0p4O...19+. | -0.87554 | -0.89225 | -0.93205 |
| EC3-C...16.. | 0.07726  | -1.12449 | 0.47937  | S3E0N...6-.. | 0.23023  | -3.14669 | 0.63523  | e0p4O...3+.. | -0.00123 | 1.88285  | -1.70384 |
| EC3-C...17.. | -0.87432 | 2.44012  | 0.12829  | S3E0N...7-.. | -0.58561 | 0.43824  | -0.00674 | e0p4O...4+.. | -0.18337 | 0.32261  | 0.39523  |
| EC3-C...18.. | -0.8897  | 0.07184  | 0.23995  | S3E0N...8-.. | -0.02605 | 0.37439  | 0.12116  | e0p4O...5+.. | 0.42456  | -0.33804 | 0.23732  |
| EC3-C...19.. | 0.33637  | -0.74043 | -0.54066 | S3E0N...9-.. | -4.35528 | 0.35463  | 0.40329  | e0p4O...6+.. | 0.01758  | 0.23207  | 0.17172  |
| EC3-C...20.. | 0.37335  | 0.22522  | 2.3851   | S3E0O...1-.. | -0.93927 | -0.88383 | -0.85516 | e0p4O...7+.. | 2.26212  | -0.96335 | 0.04421  |
| EC3-C...21.. | -0.69938 | 0.376    | 0.42     | S3E0O...10-. | 3.33965  | -1.62377 | 0.79017  | e0p4O...8+.. | 1.59711  | 0.88501  | 0.97281  |
| EC3-C...22.. | -0.55503 | -0.0714  | -0.50953 | S3E0O...13-. | 0.4249   | 4.54962  | -0.968   | e0p4O...9+.. | 0.3092   | 0.26954  | 0.42352  |
| EC3-C...24.. | 0.0914   | 0.03712  | 0.00464  | S3E0O...2-.. | 0.32657  | 2.03247  | 0.00312  | e0p4S...12+. | -0.4626  | -0.9911  | -0.56462 |
| EC3-C...25.. | -0.82089 | 0.11224  | 0.48117  | S3E0O...3-.. | 0.23745  | 0.12772  | 0.10784  | e0p4S...3+.. | -2.05418 | 0.1908   | -0.71501 |
| EC3-C...26.. | 0.74239  | 0.27776  | 0.17576  | S3E0O...4-.. | 0.15312  | -0.58104 | -0.97541 | e0p4S...6+.. | 0.6346   | -0.11714 | 2.61593  |
| EC3-C...27.. | -0.9867  | 0.05339  | -0.82894 | S3E0O...5-.. | 2.14415  | -0.59562 | 0.1896   | e0p4S...7+.. | 0.16117  | 2.33489  | 1.90844  |
| EC3-C...28.. | 0.37998  | 0.45118  | -0.24271 | S3E0O...6-.. | 1.01875  | -0.3755  | -0.56712 | e0p4S...8+.. | 2.0505   | 0.576    | 2.08547  |
| EC3-C...29.. | 0.04328  | -0.69267 | -0.73137 | S3E0O...7-.. | 0.4677   | 0.32642  | 0.17652  | e0p2o...4+.. | 1.36054  | 1.7411   | -0.07647 |
| EC3-C...30.. | 0.04602  | 0.26784  | 0.21028  | S3E0O...8-.. | 0.39449  | 0.6702   | 0.37746  | e0p2o...5+.. | 0.09351  | 2.1934   | 0.26357  |
| EC3-C...31.. | -0.9514  | 0.10559  | 0.22256  | S3E0O...9-.. | 1.11464  | 0.25608  | 0.15059  | e0p2o...6+.. | 2.13467  | 0.33404  | -0.61251 |
| EC3-C...32.. | -0.77263 | -0.77954 | 0.07958  | S3E0S...1-.. | 0.09061  | -0.68147 | 0.13089  | e0p2s...4+.. | -0.86685 | -0.03379 | -0.37583 |
| EC3-C...33.. | 0.24683  | 0.13255  | -0.53008 | S3E0S...12-. | -0.62795 | -0.9372  | 0.59073  | e0p2s...5+.. | -0.10329 | 0.26961  | -0.03742 |
| EC3-C...34.. | 0.17934  | 0.1682   | 2.02238  | S3E0S...4-.. | -0.72195 | 0.07725  | 0.13977  | e0p2s...6+.. | -4.61479 | -8.59535 | -2.45103 |
| EC3-C...35.. | 0.48339  | 1.34558  | 0.13676  | S3E0S...5-.. | 1.6353   | -0.03023 | 0.60054  | e0p3o...5+.. | -0.77796 | 0.03654  | -0.04721 |
| EC3-C...36.. | -0.6941  | -0.65949 | -1.50778 | S3E0S...7-.. | 1.84559  | 0.34975  | 2.15261  | e0p3o...6+.. | 0.1694   | -0.68075 | 1.53289  |
| EC3-C...37.. | -0.26391 | -0.64795 | 0.46617  | S3E0S...9-.. | 0.42433  | 2.39654  | -0.74903 | e0p3s...5+.. | -1.02886 | 0.00084  | -0.69737 |
| EC3-C...38.. | 2.2428   | 4.36364  | -0.95422 | S3E0o...4-.. | 0.37238  | 0.38624  | -0.5716  | e0p3s...6+.. | 2.35228  | 1.23306  | 1.43768  |
| EC3-C...39.. | -5.62347 | -7.59348 | -2.6606  | S3E0o...5-.. | 0.28786  | 2.33248  | 0.126    | e0p3s...7+.. | 1.89181  | 1.38677  | -0.13585 |
| EC3-C...40.. | 2.1921   | 0.07178  | 0.06025  | S3E0o...6-.. | -0.05434 | 2.47749  | 5.03971  | e0p4o...10+. | 0.71446  | 0.98261  | 0.98515  |
| EC3-C...41.. | 0.2567   | -0.75117 | 0.49224  | S3E0o...8-.. | -0.67585 | 0.15873  | -0.82825 | e0p4o...5+.. | 0.43094  | -0.55217 | 0.39512  |
| EC3-C...42.. | -0.60069 | -0.46004 | 0.4454   | S3E0o...9-.. | 2.16774  | 0.06689  | 1.06924  | e0p4o...8+.. | -0.60581 | -1.38851 | -1.29618 |
| EC3-C...43.. | 0.1404   | 2.07436  | 1.94814  | S3E0s...11-. | -0.61012 | 2.14623  | 0.07428  | e0p4s...11+. | 0.93326  | 2.70696  | 0.23581  |
| EC3-C...44.. | -1.01084 | -3.91763 | -0.70248 | S3E0s...5-.. | -0.4634  | 2.45161  | -0.0442  | e0p4s...5+.. | 1.91738  | 0.15689  | 2.32651  |
| EC3-C...45.. | 0.4388   | 0.76331  | 0.18277  | S3E0s...6-.. | 0.67073  | -0.55328 | 0.23021  | e0p4s...7+.. | -0.20375 | -0.72694 | 0.89493  |
| EC3-C...46.. | 0.57992  | 2.42563  | 0.39754  | S3E0s...8-.. | 1.29733  | -1.28214 | 2.21231  | e0p4s...8+.. | 0.62484  | 1.22138  | 1.60716  |
| EC3-C...47.. | -0.41757 | 0.04282  | -0.69944 | PT2-C...1... | 0.25446  | 0.0693   | 0.21564  | e0s2C...10+. | 0.28363  | 0.43828  | -0.80799 |
| EC3-C...48.. | -3.89514 | 0.49349  | -0.85123 | PT2-C...2... | 0.0104   | -0.39062 | 0.4262   | e0s2C...11+. | 0.02308  | -0.6894  | 0.14963  |
| EC3-C...49.. | 1.27036  | 1.00364  | 0.25839  | PT2-C...3... | 0.01511  | 0.39917  | 0.16105  | e0s2C...12+. | 0.0828   | -0.50526 | 0.1099   |

|               |          |          |          |               |          |          |          |               |          |          |          |
|---------------|----------|----------|----------|---------------|----------|----------|----------|---------------|----------|----------|----------|
| EC3-C...50..  | 2.26057  | 1.11994  | 2.35375  | PT2-C...4...  | 0.23879  | 2.11235  | 0.22635  | e0s2C...13+.  | 2.41737  | 2.04026  | 0.03467  |
| EC3-C...51..  | 3.27844  | 3.40051  | 2.72135  | PT2-C...5...  | 0.23234  | 0.18556  | 0.18168  | e0s2C...14+.  | 0.79528  | -0.21625 | 0.84063  |
| EC3-C...52..  | 0.94823  | -0.32316 | -0.77139 | PT2-C...6...  | -0.55037 | 0.27335  | -0.7294  | e0s2C...15+.  | 0.41416  | 0.4388   | 0.35714  |
| EC3-C...53..  | -0.47846 | -0.68309 | 0.06355  | PT2-F...2...  | -0.7776  | -0.83954 | -0.82214 | e0s2C...16+.  | 0.2974   | -0.0571  | -2.99729 |
| EC3-C...54..  | 0.1198   | 1.72054  | -0.21065 | PT2-Br...2... | 0.20027  | 0.42966  | 0.38518  | e0s2C...17+.  | 1.33291  | 2.06132  | 0.44383  |
| EC3-C...55..  | 3.17958  | 2.45057  | 1.26776  | PT2-Cl...1... | 0.15043  | 2.20063  | 0.08925  | e0s2C...18+.  | -0.04171 | 0.03733  | -0.5432  |
| EC3-C...56..  | 0.37252  | -0.15314 | 0.28864  | PT2-Cl...2... | 2.24181  | 1.83744  | 0.46165  | e0s2C...3+..  | 0.24648  | -0.18343 | -1.23651 |
| EC3-C...57..  | -0.1084  | 0.4929   | 2.09437  | PT2-N...2...  | 0.26891  | -0.33348 | 0.18241  | e0s2C...4+..  | 0.41971  | 0.0237   | 0.28022  |
| EC3-C...58..  | 0.40291  | -0.90994 | 0.49695  | PT2-N...3...  | 0.15725  | 0.00072  | 0.46811  | e0s2C...5+..  | 0.14447  | 0.08648  | 0.09886  |
| EC3-C...59..  | -0.76062 | 0.25665  | 0.31197  | PT2-N...4...  | 0.21449  | -0.59258 | 0.22417  | e0s2C...6+..  | 0.02963  | -0.01824 | 2.45376  |
| EC3-C...60..  | -0.0621  | 0.27675  | 0.22206  | PT2-N...5...  | -0.61027 | -0.45973 | 0.0295   | e0s2C...7+..  | 0.39783  | 0.28224  | 0.25459  |
| EC3-C...61..  | -0.50608 | 2.12337  | -0.71404 | PT2-N...6...  | -0.50659 | 0.39077  | 0.22569  | e0s2C...8+..  | -0.63842 | 0.3346   | 0.28393  |
| EC3-C...62..  | 0.00438  | -0.67216 | 0.25922  | PT2-O...1...  | -1.19702 | -0.05726 | -1.06649 | e0s2C...9+..  | 0.19948  | 0.45233  | 0.27579  |
| EC3-C...63..  | 0.02535  | -1.21165 | -0.59298 | PT2-O...2...  | -0.70802 | -0.8914  | 0.24298  | e0s2F...5+..  | 0.70054  | 0.15585  | 0.28428  |
| EC3-C...64..  | -0.31816 | 0.39804  | -0.72302 | PT2-O...3...  | -0.12735 | 0.13949  | -0.10439 | e0s2F...6+..  | 0.47988  | 0.13496  | -0.44289 |
| EC3-C...67..  | 1.48643  | -1.2821  | -0.91509 | PT2-O...4...  | -0.53032 | -1.66095 | -0.16213 | e0s2Br...5+.. | 0.1464   | 0.53521  | 0.43839  |
| EC3-C...7...  | -0.75002 | -0.73814 | -0.61236 | PT2-S...2...  | 2.29124  | 2.51706  | 0.47538  | e0s2Br...6+.. | -1.28715 | -0.50273 | -0.96516 |
| EC3-C...73..  | -0.3753  | -0.80296 | 0.2259   | PT2-S...3...  | -0.84643 | 2.48825  | 0.05127  | e0s2Cl...4+.. | -0.20294 | 0.4522   | 2.39549  |
| EC3-C...8...  | 1.07336  | 0.46577  | 0.12963  | PT2-S...4...  | 0.64094  | 0.40579  | 0.54594  | e0s2Cl...5+.. | 0.30239  | 0.433    | 2.25776  |
| EC3-C...9...  | 0.45059  | 2.44915  | 2.3082   | PT2-o...2...  | 2.35903  | 2.47798  | -0.183   | e0s2Cl...6+.. | -0.65338 | -0.94611 | -0.82549 |
| EC3-F...13..  | -0.73963 | 0.83686  | 2.33485  | PT2-o...3...  | 0.13127  | -0.34548 | 0.48992  | e0s3C...10+.  | 0.38811  | 0.29257  | 0.00186  |
| EC3-F...14..  | 0.4848   | -0.81918 | 0.22243  | PT2-o...4...  | 0.34623  | 1.55267  | -0.47855 | e0s3C...11+.  | -0.60808 | 0.45674  | -0.3519  |
| EC3-F...15..  | 2.51565  | 2.31785  | 2.63999  | PT2-s...2...  | 0.97315  | 0.5619   | -0.53246 | e0s3C...12+.  | 0.32492  | 0.37926  | 0.40929  |
| EC3-F...16..  | 0.50074  | -0.45175 | 0.21048  | PT2-s...3...  | -0.01151 | 0.82841  | 2.4101   | e0s3C...13+.  | 0.14137  | -0.8641  | 0.40859  |
| EC3-Br...13.. | 6.71455  | 6.37473  | 6.26475  | PT2-s...4...  | -4.45254 | -7.84056 | -1.28223 | e0s3C...14+.  | 0.12913  | -0.03029 | 0.30409  |
| EC3-Br...14.. | 0.40119  | 0.18522  | 0.3117   | PT3-C...1...  | -0.56477 | -0.89487 | -0.43404 | e0s3C...15+.  | 0.31497  | 2.25519  | 0.43862  |
| EC3-Cl...13.. | 0.34969  | 2.33702  | 1.17158  | PT3-C...2...  | 1.29018  | 0.10162  | -1.12067 | e0s3C...16+.  | 0.00879  | 0.47124  | -0.58067 |
| EC3-Cl...14.. | -0.54865 | -1.24617 | -1.58419 | PT3-C...3...  | 0.45676  | 0.47492  | 0.1986   | e0s3C...17+.  | 0.04038  | -0.74657 | -0.80964 |
| EC3-Cl...15.. | 0.48976  | 0.01094  | -0.80727 | PT3-C...4...  | 0.42883  | 0.03419  | 0.24097  | e0s3C...18+.  | -0.20837 | 2.0331   | -0.59389 |
| EC3-Cl...16.. | 0.43335  | -0.66109 | -0.08218 | PT3-C...5...  | -0.148   | -0.76297 | 0.39104  | e0s3C...19+.  | 0.41406  | 0.23967  | 0.06251  |
| EC3-Cl...7... | -0.70399 | 0.04931  | 0.17964  | PT3-C...6...  | 0.33714  | 0.24693  | 0.25203  | e0s3C...20+.  | 0.34982  | 0.32397  | 0.33175  |
| EC3-Cl...8... | -0.02058 | 0.07927  | 1.08971  | PT3-C...7...  | 0.4629   | 2.34055  | -0.00514 | e0s3C...21+.  | -0.73794 | -0.96287 | -0.53926 |
| EC3-N...11..  | 0.45148  | 0.49527  | 1.25913  | PT3-C...8...  | 0.26695  | 0.39226  | 2.09375  | e0s3C...22+.  | -0.96577 | 0.48336  | 0.28696  |
| EC3-N...18..  | -0.77315 | 0.03748  | -0.00271 | PT3-C...9...  | -0.53928 | 0.08078  | 0.24847  | e0s3C...23+.  | -1.11596 | -0.3977  | -0.03093 |
| EC3-N...19..  | 0.40666  | 2.44319  | 0.33478  | PT3-F...2...  | 0.38274  | 0.41004  | 0.11768  | e0s3C...4+..  | 1.58612  | 4.439    | 1.31169  |

|              |          |          |          |              |          |          |          |              |          |          |          |
|--------------|----------|----------|----------|--------------|----------|----------|----------|--------------|----------|----------|----------|
| EC3-N...20.. | 0.39729  | -0.86881 | -0.73119 | PT3-F...3... | 0.49343  | -0.96117 | -0.79908 | e0s3C...5+.. | -0.22572 | 0.22231  | 0.11931  |
| EC3-N...21.. | -1.07487 | 1.44079  | -0.68357 | PT3-Br..2... | 2.01079  | 2.23228  | 0.035    | e0s3C...6+.. | -0.69696 | 2.4127   | 0.23294  |
| EC3-N...22.. | -0.77258 | 0.46284  | -0.75409 | PT3-Br..3... | -0.621   | 0.05247  | 0.11333  | e0s3C...7+.. | -4.69471 | -1.2232  | 0.54447  |
| EC3-N...23.. | 4.47468  | 0.3339   | 2.19531  | PT3-Cl..2... | 0.18659  | 0.29612  | 0.05552  | e0s3C...8+.. | 0.46252  | 0.03358  | 0.423    |
| EC3-N...24.. | -0.82288 | 0.07006  | 0.18356  | PT3-Cl..3... | 1.19216  | 0.51779  | -0.52696 | e0s3C...9+.. | 0.55076  | -0.95326 | 0.01796  |
| EC3-N...25.. | -0.76112 | 0.16091  | -0.7494  | PT3-N...1... | 0.26717  | -0.60636 | -0.53077 | e0s2N...10+. | 1.37279  | 0.32675  | 0.25599  |
| EC3-N...26.. | -9.74342 | -9.98429 | 0.20476  | PT3-N...2... | 0.287    | -0.08437 | 0.06108  | e0s2N...11+. | 0.17601  | 0.18085  | 0.32788  |
| EC3-N...27.. | 0.23482  | -0.01961 | 0.40325  | PT3-N...3... | 0.44718  | -0.45533 | 0.32902  | e0s2N...12+. | 0.66483  | 2.20169  | 0.4971   |
| EC3-N...28.. | -0.23515 | -0.91014 | -0.56576 | PT3-N...4... | -0.94672 | 0.43766  | 0.11704  | e0s2N...13+. | 0.38183  | -0.99152 | 0.34408  |
| EC3-N...29.. | 2.07828  | 1.54962  | 0.74321  | PT3-N...5... | -0.64698 | 0.10138  | 1.32398  | e0s2N...14+. | -0.72413 | -4.49693 | -0.93082 |
| EC3-N...30.. | 0.24997  | 0.42254  | -0.81375 | PT3-N...6... | -0.79221 | 0.24709  | 0.19353  | e0s2N...15+. | -0.68755 | -0.58    | 0.14095  |
| EC3-N...31.. | -0.86675 | 0.22567  | 0.13594  | PT3-N...7... | -0.70767 | -0.71245 | 0.3442   | e0s2N...16+. | -0.40794 | 0.26939  | -0.22353 |
| EC3-N...32.. | 2.64128  | 2.23265  | 0.45034  | PT3-N...8... | 2.21669  | 2.34135  | 0.00539  | e0s2N...17+. | 3.80867  | 4.03358  | 2.0866   |
| EC3-N...33.. | 2.38669  | 2.14317  | 0.09121  | PT3-O...1... | 0.2805   | -0.07065 | 0.11413  | e0s2N...4+.. | 0.46123  | 0.27832  | -0.20141 |
| EC3-N...34.. | 0.1299   | 0.4716   | -0.79014 | PT3-O...2... | 0.09109  | -0.10368 | 0.42608  | e0s2N...7+.. | -1.62868 | -0.04157 | -0.63087 |
| EC3-N...35.. | -0.5526  | -0.50295 | 2.66565  | PT3-O...3... | 0.24514  | -0.69168 | 0.18021  | e0s2N...8+.. | 0.2621   | 0.24078  | 0.31508  |
| EC3-N...36.. | 0.72725  | 0.61258  | -0.08839 | PT3-O...4... | 2.41388  | 1.05345  | 0.37069  | e0s2N...9+.. | 0.51274  | 0.20414  | 0.37486  |
| EC3-N...38.. | 0.37647  | 0.40865  | 0.11955  | PT3-O...5... | 0.28582  | -0.67247 | 0.44503  | e0s2O...10+. | 4.22034  | 1.92666  | 0.50933  |
| EC3-N...39.. | 0.63607  | 0.13864  | 1.52788  | PT3-O...6... | -0.76382 | 2.67907  | -1.03992 | e0s2O...11+. | -0.88276 | -0.65226 | -0.10429 |
| EC3-N...41.. | 2.46111  | 2.61004  | -0.2276  | PT3-S...2... | 1.86384  | 0.1626   | -3.30216 | e0s2O...4+.. | 0.4835   | -0.43383 | 1.00819  |
| EC3-N...42.. | 1.79283  | 2.187    | 2.38598  | PT3-S...3... | -0.69645 | 2.44017  | -0.11805 | e0s2O...5+.. | 0.07283  | 1.38092  | 0.04336  |
| EC3-N...43.. | -0.79234 | -0.97751 | -0.11    | PT3-S...4... | 2.02275  | 0.4295   | 0.43765  | e0s2O...6+.. | 0.21566  | 0.29905  | 0.48506  |
| EC3-N...44.. | 0.4326   | 0.29253  | 0.6581   | PT3-S...6... | 0.26073  | -0.74893 | 1.30128  | e0s2O...7+.. | 0.22443  | 0.07866  | -0.13582 |
| EC3-N...45.. | 0.09203  | -1.31588 | -0.64163 | PT3-o...3... | 0.33135  | -0.81257 | 0.15236  | e0s2O...8+.. | -1.00423 | 0.11839  | 0.52276  |
| EC3-N...47.. | -0.96075 | -0.69625 | -0.8336  | PT3-o...4... | 0.24298  | 2.09265  | 0.00176  | e0s2O...9+.. | 0.00885  | 0.47217  | 0.22994  |
| EC3-N...48.. | -0.58218 | -2.0013  | 0.20778  | PT3-s...3... | -0.72682 | -0.67342 | -0.82591 | e0s3F...5+.. | -0.5303  | 0.4384   | -0.91886 |
| EC3-N...50.. | -0.14582 | -1.89878 | -0.92649 | PT3-s...4... | 2.15052  | 2.48839  | 2.11635  | e0s3F...6+.. | 0.10784  | -0.43326 | 0.318    |
| EC3-N...51.. | 2.19357  | 2.33966  | -0.24405 | PT3-s...5... | 0.75956  | -1.35258 | 0.34659  | e0s3F...7+.. | 0.30865  | 2.12979  | 2.04866  |
| EC3-N...52.. | 0.20478  | 0.78068  | -1.35822 | PT4-C...1... | 0.42208  | -1.92986 | -0.152   | e0s3F...8+.. | 0.11544  | -0.86912 | 0.29264  |
| EC3-N...53.. | 2.3774   | 0.25176  | 1.11935  | PT4-C...10.. | -0.69424 | -0.50114 | -0.73166 | e0s3Br..5+.. | 3.53791  | 6.71238  | 2.55523  |
| EC3-N...55.. | 0.49669  | 0.25994  | 0.27297  | PT4-C...11.. | 2.03684  | 0.27353  | 0.46569  | e0s3Br..6+.. | 0.33988  | 0.3588   | -0.18722 |
| EC3-N...56.. | -0.36685 | -1.92685 | -1.02506 | PT4-C...12.. | 0.47871  | 0.19061  | 1.1254   | e0s2S...10+. | -0.78877 | -0.04126 | -0.13743 |
| EC3-N...58.. | 2.18928  | 0.46184  | 1.30542  | PT4-C...13.. | -0.8079  | -1.06188 | 0.98847  | e0s2S...12+. | -0.14245 | -1.46549 | -0.95956 |
| EC3-N...59.. | -1.02558 | -4.32443 | -1.68341 | PT4-C...14.. | -0.17964 | 0.06681  | 0.25528  | e0s2S...5+.. | -0.30041 | 0.28562  | -0.10274 |
| EC3-N...60.. | 0.26085  | 2.01269  | 0.19436  | PT4-C...15.. | -0.44902 | -0.70689 | -0.25441 | e0s2S...7+.. | 2.45868  | 1.9517   | 0.15081  |



|              |          |          |          |              |          |          |          |              |          |          |          |
|--------------|----------|----------|----------|--------------|----------|----------|----------|--------------|----------|----------|----------|
| EC3-O...11.. | -0.12347 | -0.40081 | -0.13179 | PT4-C...16.. | -0.61148 | 0.50198  | 0.08761  | e0s2S...8+.. | -0.56181 | 1.59458  | 0.1188   |
| EC3-O...12.. | 0.45666  | -0.27435 | 0.3635   | PT4-C...17.. | 0.069    | 0.17921  | 0.12884  | e0s2S...9+.. | 2.01107  | 0.1417   | 1.51467  |
| EC3-O...13.. | -0.16318 | -0.48587 | 0.09868  | PT4-C...2... | 0.1286   | 0.41307  | 0.35261  | e0s3Cl..4+.. | -0.52796 | 0.17811  | 1.87768  |
| EC3-O...14.. | 0.13447  | -0.20017 | 0.20687  | PT4-C...18.. | 0.30303  | -0.48782 | -0.73343 | e0s3Cl..5+.. | 0.25307  | 2.7312   | 1.89931  |
| EC3-O...15.. | 0.22826  | 2.00338  | 0.52951  | PT4-C...3... | -0.23984 | 0.02758  | 0.41206  | e0s3Cl..6+.. | 0.09765  | 0.00685  | 0.28969  |
| EC3-O...16.. | -0.91846 | 2.00704  | 0.15305  | PT4-C...4... | 0.23529  | 0.00657  | 0.29259  | e0s3Cl..7+.. | 0.00495  | -0.88592 | 0.04749  |
| EC3-O...17.. | -0.30323 | -0.64254 | -0.83154 | PT4-C...5... | 0.11967  | 1.30695  | 2.00534  | e0s3Cl..8+.. | -1.00134 | -0.78537 | -0.61551 |
| EC3-O...18.. | 0.39478  | -0.61682 | -0.05201 | PT4-C...6... | 0.18749  | 0.25961  | 0.26883  | e0s3N...10+  | 0.2379   | 0.07329  | -0.10401 |
| EC3-O...19.. | 2.41916  | 0.4321   | 1.37393  | PT4-C...7... | 1.19135  | 1.58921  | 2.40401  | e0s3N...11+  | 0.63553  | 0.27717  | 0.4804   |
| EC3-O...20.. | -0.06463 | -0.76158 | -0.62473 | PT4-C...8... | 0.46899  | 0.16917  | 0.08514  | e0s3N...12+  | -0.55731 | -1.12994 | 0.21124  |
| EC3-O...21.. | -0.29967 | 1.14599  | 0.05506  | PT4-C...9... | 0.19327  | 0.28984  | 0.17753  | e0s3N...13+  | -2.52653 | -1.96334 | -7.15284 |
| EC3-O...22.. | -1.05661 | 1.56339  | 0.49568  | PT4-F...2... | 1.24609  | -0.5329  | 0.20058  | e0s3N...14+  | -0.45047 | -0.86609 | 0.11029  |
| EC3-O...23.. | 0.40499  | 2.45761  | -0.66251 | PT4-F...5... | 0.17607  | -0.23447 | 0.4723   | e0s3N...15+  | -0.443   | -0.75191 | -0.42883 |
| EC3-O...24.. | -0.27276 | -0.72075 | 0.65919  | PT4-Br..2... | 2.39665  | 2.10155  | 0.40698  | e0s3N...16+  | 0.34688  | 0.42714  | -0.05061 |
| EC3-O...25.. | -0.77762 | -0.77366 | -0.4498  | PT4-Br..5... | -0.92996 | -0.85895 | 0.06694  | e0s3N...17+  | 0.26057  | 0.11198  | 0.05689  |
| EC3-O...27.. | 2.49443  | 2.07676  | 2.29724  | PT4-Cl..2... | -0.15259 | 2.44971  | 2.12274  | e0s3N...18+  | 2.4074   | 0.24233  | 0.23138  |
| EC3-O...28.. | 0.21841  | 0.72734  | 1.49079  | PT4-Cl..4... | 0.22708  | -0.97919 | -0.87897 | e0s3N...19+  | 0.31891  | 0.13577  | -0.45152 |
| EC3-O...32.. | 2.46657  | 2.74136  | 2.25542  | PT4-Cl..5... | -0.79795 | -0.09277 | -0.62732 | e0s3N...20+  | 0.19041  | -0.22953 | 0.24669  |
| EC3-O...33.. | 2.04924  | 1.2565   | 3.98774  | PT4-N...1... | 0.55799  | 0.43577  | -0.90503 | e0s3N...24+  | 0.49755  | -0.01563 | 2.34721  |
| EC3-O...35.. | -0.82875 | -0.76781 | -0.60688 | PT4-N...10.. | -0.58567 | -0.31984 | -0.48783 | e0s3N...3+.. | 0.48964  | 0.16283  | 0.12483  |
| EC3-S...14.. | -1.01298 | -1.62648 | -0.55086 | PT4-N...11.. | 2.42647  | 0.10145  | -0.50982 | e0s3N...6+.. | 0.41391  | -0.92941 | -0.78327 |
| EC3-S...23.. | 2.31511  | 2.15739  | 1.73124  | PT4-N...12.. | 2.79413  | -1.72994 | -0.17318 | e0s3N...8+.. | 0.30858  | 0.2933   | 0.16018  |
| EC3-S...25.. | 4.18039  | -0.027   | 2.02285  | PT4-N...13.. | 0.29598  | 0.06228  | 2.07408  | e0s3N...9+.. | 1.42636  | 4.47233  | 0.59799  |
| EC3-S...35.. | -0.63081 | -1.31345 | -0.41031 | PT4-N...14.. | 2.20713  | 2.00761  | 0.41539  | e0s3O...10+  | 0.11108  | 0.28091  | 0.45484  |
| EC3-S...38.. | -0.24301 | 1.08536  | 0.00896  | PT4-N...16.. | 2.58681  | 2.30829  | -0.27888 | e0s3O...11+  | 1.22338  | 0.24157  | 0.18626  |
| EC3-o...23.. | 1.71128  | 1.22366  | 2.00508  | PT4-N...2... | -0.43051 | -0.64696 | 0.29593  | e0s3O...12+  | 0.3787   | -0.27914 | -0.91377 |
| EC3-o...24.. | -0.82291 | 0.44509  | -0.65129 | PT4-N...22.. | -0.34746 | -0.8065  | 0.19785  | e0s3O...13+  | -0.33451 | -0.67679 | -0.54797 |
| EC3-o...25.. | 0.14954  | -0.29356 | 0.57957  | PT4-N...3... | -0.96762 | 0.3798   | -0.97567 | e0s3O...15+  | -1.08309 | -0.75148 | 0.88993  |
| EC3-o...26.. | 1.24554  | 4.14851  | 2.11004  | PT4-N...4... | 0.47205  | 1.41412  | 0.40732  | e0s3O...3+.. | 0.2392   | -0.52028 | 0.22321  |
| EC3-o...28.. | -0.66109 | -0.498   | -0.87538 | PT4-N...5... | -0.30512 | -1.10182 | -0.96848 | e0s3O...4+.. | 0.24082  | 0.29293  | 1.27095  |
| EC3-o...35.. | 2.09204  | 2.18342  | 2.12962  | PT4-N...6... | -0.30112 | -0.12376 | -0.76973 | e0s3O...5+.. | -0.77087 | 0.21005  | 0.34387  |
| EC3-s...20.. | -1.08807 | 0.3158   | -1.02984 | PT4-N...7... | 7.51721  | 3.25739  | -1.60476 | e0s3O...6+.. | 0.01115  | 0.11899  | 0.47877  |
| EC3-s...26.. | 0.00947  | 0.96908  | 2.16359  | PT4-N...8... | -0.14404 | 0.36462  | 1.23865  | e0s3O...7+.. | 0.18614  | 2.31159  | 0.32537  |
| EC3-s...28.. | 1.98136  | 0.96746  | -0.77692 | PT4-N...9... | 0.38077  | -0.89649 | 0.48502  | e0s3O...8+.. | -0.83938 | 0.08941  | 0.22432  |
| EC3-s...31.. | 2.62267  | -0.98167 | 1.42922  | PT4-O...1... | 1.37096  | 0.01705  | -0.04746 | e0s3O...9+.. | -0.05488 | 0.16777  | -0.54279 |

|              |          |          |          |              |          |          |          |              |          |          |          |
|--------------|----------|----------|----------|--------------|----------|----------|----------|--------------|----------|----------|----------|
| EC3-s...37.. | 0.2403   | 0.26811  | 0.21     | PT4-O...13.. | -1.50701 | -1.09625 | 0.19097  | e0s3S...11+. | 0.46234  | 2.16379  | 2.348    |
| H.....       | 0.89678  | 2.97961  | 0.21829  | PT4-O...2... | 0.36697  | 0.20108  | -0.70637 | e0s3S...13+. | 1.31148  | 0.34806  | -0.72935 |
| Br..(.....   | -2.31961 | -2.79923 | -1.4517  | PT4-O...18.. | 0.23504  | -0.48254 | -0.51993 | e0s3S...16+. | 0.01112  | -0.97941 | 0.39022  |
| Br..(...C... | -0.59845 | 0.45082  | -0.27149 | PT4-O...3... | 0.48588  | -0.10847 | -0.96543 | e0s3S...6+.. | 0.04327  | -1.15905 | -0.31894 |
| Br.....      | 0.36912  | 0.41168  | 1.14251  | PT4-O...4... | 0.39082  | 1.45783  | 0.45152  | e0s3S...9+.. | 2.63493  | 10.32733 | 9.17314  |
| Br..c...1... | 0.21202  | 0.01707  | 2.02815  | PT4-O...5... | 0.33873  | -0.5392  | -0.32683 | e0s2o...10+. | 0.01986  | -0.67877 | 0.84987  |
| Cl..(.....   | -0.95718 | 0.61057  | 0.44041  | PT4-O...6... | 3.45186  | 0.71846  | 0.335    | e0s2o...8+.. | 0.09057  | 0.01514  | -0.74567 |
| Cl..(...1... | 0.83591  | -0.78967 | 0.30389  | PT4-O...7... | -0.52015 | -0.90714 | 3.96309  | e0s2o...9+.. | 0.40876  | -0.24864 | 0.32664  |
| Cl..(...2... | 2.18608  | 0.05885  | 2.43016  | PT4-O...8... | -0.94387 | -0.64319 | 0.81537  | e0s2s...11+. | 0.49004  | -1.11992 | 0.05659  |
| Cl..(...Cl.. | 0.14765  | -1.88091 | 0.53108  | PT4-O...9... | -0.54838 | 0.14914  | 0.23599  | e0s2s...7+.. | 0.09324  | 0.03739  | -0.33584 |
| Cl.....      | 0.03501  | 0.52815  | -0.86741 | PT4-S...10.. | 0.01948  | 0.25989  | -0.3344  | e0s2s...9+.. | 3.55913  | 4.50171  | 1.68066  |
| Cl..1.....   | -0.97697 | -0.64197 | -0.97209 | PT4-S...2... | 0.5859   | -0.54629 | -4.22334 | e0s3o...10+. | 0.29621  | 1.46135  | 4.95425  |
| Cl..C.....   | 2.00104  | 2.48238  | -0.50044 | PT4-S...5... | 1.28269  | 2.34703  | -0.21107 | e0s3o...12+. | -0.75128 | -0.43578 | -0.24922 |
| Cl..C...C... | 0.36561  | 0.01188  | 0.12703  | PT4-S...6... | 1.147    | 2.07079  | 1.85755  | e0s3o...13+. | 1.07271  | 2.21836  | 1.31321  |
| Cl..c...1... | 4.3243   | 0.5122   | 1.25189  | PT4-o...3... | 0.42921  | 0.17841  | 0.16043  | e0s3o...8+.. | -0.91067 | -0.93903 | 0.58624  |
| Cmax.1.....  | -0.80591 | 1.08364  | -0.05379 | PT4-o...6... | -1.79995 | -2.58895 | -2.72761 | e0s3o...9+.. | 2.31314  | 0.3736   | 0.48936  |
| Cmax.2.....  | -0.70572 | -0.48621 | 0.42893  | PT4-o...8... | 0.45718  | 2.35114  | 0.08014  | e0s3s...10+. | -0.35635 | 0.15468  | -0.79801 |
| Cmax.3.....  | 2.31983  | 2.26876  | -0.72641 | PT4-s...3... | 1.2109   | -0.02519 | 3.28907  | e0s3s...12+. | 2.17992  | 0.6088   | 2.99656  |
| HALO00000000 | 0.49841  | 1.06342  | 0.23296  | PT4-s...5... | -1.28085 | 0.09922  | -0.47482 | e0s3s...15+. | -0.84569 | 0.02836  | 0.26181  |
| HALO00100000 | 2.46865  | 1.2245   | -1.33792 | PT4-s...6... | 0.33047  | 0.36743  | 2.43622  | e0s3s...9+.. | -0.01375 | 2.22087  | -0.60565 |
| HALO01000000 | -0.26839 | -1.92121 | 1.97373  | PT4-s...9... | 0.00905  | 2.20336  | -0.07072 | e0nnC...102+ | -0.26835 | 0.46876  | 0.33394  |
| HALO10000000 | -0.19363 | -0.52712 | 0.62303  | Nmax.0.....  | 2.8306   | 1.38072  | 2.23903  | e0nnC...111+ | 0.4909   | 0.03032  | 0.16418  |
| HALO10100000 | 2.00342  | 1.4555   | 1.22493  | Nmax.1.....  | 0.13778  | 0.25297  | 0.38643  | e0nnC...204+ | 0.2135   | 0.04661  | -2.60528 |
| HALO11000000 | -0.61618 | 0.15821  | -0.80196 | Nmax.2.....  | 2.40929  | 0.19397  | 0.27371  | e0nnC...213+ | -0.92306 | 0.40976  | 0.21202  |
| HALO11100000 | -1.46825 | -0.96083 | -0.39065 | Nmax.3.....  | 0.18661  | -1.01225 | 0.36461  | e0nnC...222+ | 0.08025  | -0.66826 | -0.53828 |
| N...(.....   | 0.35248  | -0.12537 | -0.81142 | Nmax.4.....  | 0.45299  | -0.90449 | -0.69629 | e0nnC...306+ | -1.35365 | -1.03976 | -0.00294 |
| N...(...1... | -0.75675 | 0.84863  | 0.00873  | Omax.1.....  | 0.4973   | 0.0018   | -0.64437 | e0nnC...315+ | 0.20669  | -3.00856 | -0.82151 |
| N...(...C... | -0.21659 | 0.2758   | 0.08496  | Omax.2.....  | 3.42136  | 2.37076  | 2.25833  | e0nnC...324+ | 0.18926  | 0.40724  | -0.68808 |
| N...+.....   | -0.87132 | -0.96453 | -1.27362 | Omax.3.....  | 0.25608  | 2.27222  | 1.97351  | e0nnC...333+ | -0.61913 | 0.20436  | 0.45031  |
| N.....       | -0.61072 | -0.53831 | 0.05425  | Omax.4.....  | -3.13641 | -1.05822 | -1.83583 | e0nnC...435+ | -0.68759 | 0.50274  | -0.0533  |
| N...1.....   | 1.42567  | 0.09595  | 0.21592  | Omax.5.....  | -0.00591 | -0.30399 | 0.11918  | e0nnC...444+ | 0.45785  | 2.24527  | -1.04165 |
| N...1...C... | 1.86629  | 4.64481  | -0.00495 | Omax.7.....  | -0.92579 | 1.02599  | -0.85459 | e0nnF...111+ | 0.3349   | 0.08334  | 0.2532   |
| N...1...N... | -0.65    | 0.17332  | 0.40911  | VS2-C...10.. | 1.38407  | 0.72743  | 0.45669  | e0nnBr..111+ | -0.04566 | 2.30613  | -0.89873 |
| N...2.....   | 0.2998   | -0.35555 | -1.05923 | VS2-C...11.. | 0.42574  | -0.57049 | 0.2984   | e0nnCl..111+ | 0.44556  | 0.3887   | -0.80044 |
| N...2...C... | 0.02195  | 1.39331  | -0.61813 | VS2-C...12.. | 0.47504  | 0.39153  | 0.05779  | e0nnN...111+ | -0.01902 | 0.22348  | 0.35738  |

|              |          |          |          |              |          |          |          |              |          |          |          |
|--------------|----------|----------|----------|--------------|----------|----------|----------|--------------|----------|----------|----------|
| N...=.....   | -0.57441 | 2.61859  | -0.11743 | VS2-C...13.. | 0.4547   | -0.87171 | 0.43206  | e0nnN...204+ | -0.51019 | 0.07391  | 0.16291  |
| N...=...C... | 2.23926  | -0.11195 | -0.42279 | VS2-C...14.. | 0.38394  | 0.4596   | 0.1299   | e0nnN...213+ | 0.04699  | -0.45019 | 0.80574  |
| N...C...(... | -0.78602 | 0.11425  | -0.68113 | VS2-C...15.. | -0.84177 | -1.94109 | 1.03908  | e0nnN...222+ | 0.33317  | -0.15933 | -0.89743 |
| N...C.....   | -0.40371 | 0.22941  | -0.65579 | VS2-C...2... | -0.89662 | -0.4577  | 0.30536  | e0nnN...315+ | 1.13751  | -0.86983 | 0.68222  |
| N...C...1... | 2.12146  | 0.26976  | 0.18247  | VS2-C...3... | 1.23068  | 0.38735  | 0.14678  | e0nnN...324+ | -0.03569 | 0.16708  | 0.09088  |
| N...C...2... | 1.15511  | 2.30103  | 0.10391  | VS2-C...4... | 0.11794  | 0.48692  | 0.41945  | e0nnN...333+ | 0.18758  | 0.29942  | -0.53914 |
| N...C...C... | 5.83411  | 6.81947  | 2.03521  | VS2-C...5... | 0.10172  | 0.60464  | -0.93757 | e0nnO...102+ | -0.18289 | 0.37783  | -0.67987 |
| N...N...(... | -0.97812 | -1.10514 | 0.30803  | VS2-C...6... | 0.29477  | 0.63962  | -0.55993 | e0nnO...111+ | 0.24563  | 0.40195  | 0.14759  |
| N...N.....   | 2.23962  | 2.25339  | 0.13211  | VS2-C...7... | -0.69819 | -0.06214 | 0.11691  | e0nnO...213+ | 0.4004   | 0.5662   | 2.13864  |
| N...N...=... | 0.13933  | 0.23872  | 0.28748  | VS2-C...8... | 0.04004  | -0.13492 | 0.70959  | e0nnO...222+ | 0.44606  | -0.47718 | 0.13313  |
| N...N...C... | -0.60089 | -0.1096  | 0.01787  | VS2-C...9... | 0.2772   | -0.50324 | -0.77541 | e0nnS...111+ | -0.90701 | 0.18387  | -0.76549 |
| N...[...(... | 2.24563  | -0.17968 | -0.82755 | VS2-F...4... | -1.61332 | -0.70755 | 0.41691  | e0nnS...222+ | 0.36614  | 0.10389  | -0.4678  |
| N...[...1... | -0.6863  | 0.08052  | 0.12762  | VS2-F...5... | -0.95116 | 0.05127  | -0.65364 | e0nnS...426+ | 1.00777  | 1.17979  | 0.03227  |
| N...c...1... | -0.65653 | -0.30374 | -0.73751 | VS2-Br..4... | 2.44327  | 2.07903  | 2.37106  | e0nno...204+ | 0.23278  | 1.9705   | 2.59109  |
| N...c...2... | 4.74282  | 5.38096  | 2.43725  | VS2-Br..5... | 0.33303  | -0.69641 | -0.5473  | e0nno...222+ | 0.49457  | 2.33966  | 0.2871   |
| O...(...(... | -1.34551 | 0.32495  | -0.21474 | VS2-Cl..3... | 1.25434  | -0.28018 | 0.22487  | e0nns...213+ | -1.63575 | -1.21582 | -0.17567 |
| O...(.....   | 0.10035  | 0.27528  | 0.25367  | VS2-Cl..4... | 2.15842  | 2.19455  | 0.47377  | e0nns...222+ | 0.28853  | 2.18978  | 0.02666  |
| O...(../...  | -0.88041 | 0.00958  | 0.12893  | VS2-Cl..5... | -0.80908 | -0.86913 | 1.33063  | n...(.....   | 0.09641  | 0.21663  | 0.45282  |
| O...(...1... | -0.75834 | 0.4239   | 0.35185  | VS2-N...10.. | 0.04925  | 0.76657  | 0.61846  | n...(...1... | 0.35253  | 0.19676  | -0.35001 |
| O...(...2... | -0.15368 | 2.49441  | 2.24113  | VS2-N...11.. | -0.0815  | -1.09916 | -0.38202 | n...(...O... | -0.83423 | 0.30829  | 0.02803  |
| O...(...C... | 0.24582  | 0.03808  | 0.27915  | VS2-N...12.. | -0.12205 | -1.08795 | 0.05175  | n...(...c... | 2.05941  | 1.96844  | 0.36533  |
| O...(...F... | -0.53035 | 4.02393  | 2.23811  | VS2-N...13.. | 0.05173  | 0.31179  | -0.83179 | n...+.....   | -0.05218 | 0.49026  | 0.46647  |
| O...(...N... | -0.04156 | -1.81111 | 0.47604  | VS2-N...14.. | 1.20055  | 4.1435   | 2.86398  | n...+...[... | 1.01381  | 0.45494  | 0.26647  |
| O...(...O... | -0.64541 | 2.36654  | -0.75104 | VS2-N...3... | 0.56818  | 0.07054  | -0.67302 | n.....       | 0.32298  | -0.6438  | 0.36189  |
| O...-.....   | 1.39401  | -0.7654  | 0.15458  | VS2-N...4... | 2.96503  | 2.46034  | 2.23389  | n...1...(... | -0.80894 | 0.33474  | -0.38065 |
| O.....       | -0.70025 | 0.26093  | -0.73823 | VS2-N...5... | -0.09425 | 0.47866  | -0.13984 | n...1.....   | 0.14668  | 0.36842  | 0.30787  |
| O...1...(... | -1.51952 | -2.10862 | 3.18822  | VS2-N...6... | 0.25234  | -0.05388 | 0.06884  | n...1...C... | 1.57742  | 0.21353  | 0.099    |
| O...1.....   | 0.54077  | 2.39146  | 0.02311  | VS2-N...7... | -0.17728 | -0.69471 | -0.82874 | n...1...[... | 1.22073  | 0.02362  | 0.24116  |
| O...=...(... | -0.55521 | 0.02474  | -0.65005 | VS2-N...8... | 0.1816   | 0.47095  | 0.27634  | n...1...c... | -0.21795 | 0.31245  | 0.31641  |
| O...=.....   | -0.56927 | -0.17535 | -0.93516 | VS2-N...9... | 0.07825  | -0.29272 | 0.20383  | n...1...n... | 0.07161  | 0.36388  | 0.42428  |
| O...=...1... | 0.33424  | -1.33652 | 0.30233  | VS2-O...3... | -0.34438 | -0.50391 | -0.26518 | n...2.....   | 0.56476  | 0.00738  | -0.20623 |
| O...=...2... | -1.3442  | -1.43252 | -0.95522 | VS2-O...4... | 0.26289  | 0.37849  | 0.552    | n...2...C... | 1.40918  | 1.95453  | -0.90256 |
| O...=...C... | -0.04624 | -0.72001 | 0.28246  | VS2-O...5... | 0.15004  | 0.09638  | 0.24372  | n...2...n... | 1.31646  | 0.86058  | -0.19383 |
| O...C...(... | 1.23145  | 0.05876  | 0.31019  | VS2-O...6... | 1.15581  | 1.8592   | 1.40649  | n...C...(... | 0.36029  | 0.2839   | -0.86262 |
| O...C.....   | 0.44544  | 2.44785  | 0.04362  | VS2-O...7... | 0.3868   | 0.36399  | 2.23596  | n...C.....   | 0.05115  | 0.27151  | 0.30878  |

|               |          |          |          |              |          |          |          |              |          |          |          |
|---------------|----------|----------|----------|--------------|----------|----------|----------|--------------|----------|----------|----------|
| O...C...1...  | 1.05478  | -1.10829 | 0.9711   | VS2-O...8... | 0.28238  | 2.33282  | 0.92794  | n...C...C... | 0.20329  | -0.20365 | 0.48976  |
| O...C...C...  | 2.28312  | 2.45744  | 0.61907  | VS2-O...9... | 0.13822  | 0.01627  | -0.57058 | n...H.....   | 3.48506  | 1.71904  | -0.99867 |
| O...C...N...  | -1.69091 | -1.9792  | -1.0682  | VS2-S...10.. | 0.28901  | -1.05848 | 0.01636  | n...H...[... | 0.13677  | 1.53383  | -0.77528 |
| O...[...(...  | -0.95302 | -0.14045 | 0.17418  | VS2-S...4... | 0.5139   | 0.53499  | -0.71959 | n...O.....   | 0.14188  | -0.66129 | 2.1398   |
| O...[...1...  | -0.70786 | -0.6487  | 0.3735   | VS2-S...5... | -0.64596 | 0.3041   | -0.2332  | n...O...C... | 1.12812  | -0.39734 | -0.75783 |
| O...c...1...  | 0.76218  | 0.30401  | 0.42498  | VS2-S...7... | 2.00347  | 2.09294  | 0.08534  | n...[...(... | 0.08031  | 0.0207   | 0.3171   |
| O...c...2...  | -0.7944  | 2.13301  | 1.94981  | VS2-S...8... | -0.88182 | -0.06688 | 0.14057  | n...[.....   | 0.6555   | 2.16689  | 2.0211   |
| O...c...3...  | 0.88807  | -1.18153 | -0.67053 | VS2-o...6... | 0.46421  | 0.02409  | 0.26852  | n...[...1... | 2.14383  | -0.9717  | 2.21785  |
| O...n...1...  | 0.15826  | -0.2156  | -0.05466 | VS2-o...7... | 0.34192  | 2.27018  | 0.23761  | n...[...c... | 2.2504   | 0.28929  | 0.18621  |
| P2E0C...0-..  | 0.17145  | 0.38359  | 0.36592  | VS2-o...8... | 2.42288  | -0.23439 | 0.04008  | n...[...n... | 1.34076  | 0.0399   | 0.35453  |
| P2E0C...1-..  | -0.07334 | -0.66504 | -0.18458 | VS2-s...5... | -0.00427 | 1.67686  | 0.30239  | n...c...(... | 1.21262  | 0.15215  | -0.52035 |
| P2E0C...2-..  | 0.40136  | 0.07832  | 0.02013  | VS2-s...7... | 0.93305  | 2.56815  | 0.20563  | n...c.....   | 0.7922   | 2.42025  | 0.25851  |
| P2E0C...3-..  | 0.05077  | -0.78601 | -0.64163 | VS2-s...9... | 0.01198  | -0.82854 | -0.72734 | n...c...1... | 0.01573  | 1.88952  | 0.44941  |
| P2E0F...1-..  | 0.10628  | 0.33401  | -0.83658 | VS3-C...10.. | -0.31273 | 0.03401  | -2.35658 | n...c...2... | 0.63351  | 0.07769  | -0.05478 |
| P2E0Br...1-.. | -0.12523 | -0.24204 | 0.33677  | VS3-C...11.. | 0.2785   | 0.37974  | 0.10586  | n...c...3... | 2.70713  | 0.34284  | 0.60643  |
| P2E0Cl...0-.. | -0.69339 | 2.46819  | 0.15703  | VS3-C...12.. | 1.13457  | 2.42959  | 0.32075  | n...c...c... | 1.41939  | -0.61488 | 0.20197  |
| P2E0Cl...1-.. | 1.32378  | 1.5548   | 0.06117  | VS3-C...13.. | 0.17366  | 0.46471  | 2.43279  | n...c...n... | -0.82021 | -1.08132 | 2.21471  |
| P2E0N...0-..  | 0.27787  | -0.06264 | 0.40386  | VS3-C...14.. | -0.93999 | -0.79744 | 0.43762  | n...n.....   | -0.63141 | -0.93151 | -0.04912 |
| P2E0N...1-..  | -0.61022 | 0.54117  | 0.20841  | VS3-C...15.. | -0.05628 | 0.04953  | 0.18014  | n...n...1... | 0.32839  | 0.35192  | 0.12872  |
| P2E0N...2-..  | -0.82469 | -0.41497 | 0.09268  | VS3-C...16.. | 0.03568  | 0.08532  | 0.48205  | n...n...2... | 2.61541  | 1.48424  | -0.16594 |
| P2E0N...3-..  | -0.17755 | -0.96673 | 0.39838  | VS3-C...17.. | 0.44917  | -0.07569 | -0.62708 | n...n...c... | 0.21464  | 0.20351  | 0.08559  |
| P2E0O...0-..  | 0.1456   | 0.90496  | 0.03372  | VS3-C...18.. | 0.01936  | 0.61583  | 0.00515  | n...o...n... | -0.59246 | 2.47931  | 0.18141  |
| P2E0O...1-..  | 0.26782  | 0.71819  | 0.16201  | VS3-C...19.. | 0.46703  | 0.7137   | 0.28673  | n...s...c... | -1.99768 | -0.31588 | -0.00748 |
| P2E0O...2-..  | 2.34567  | -0.00752 | 0.15577  | VS3-C...20.. | -1.07845 | -0.83334 | -0.78429 | o...(.....   | 0.42935  | 0.08798  | -0.54202 |
| P2E0S...0-..  | 0.13766  | 0.13375  | 0.24243  | VS3-C...3... | -1.23534 | 0.77184  | -2.11194 | o...(O...    | 2.41601  | 1.84773  | 2.01934  |
| P2E0S...1-..  | -5.95268 | -8.4813  | -2.71129 | VS3-C...4... | 0.15275  | 0.37931  | 0.70034  | o...(c...    | 0.26605  | 1.34438  | 0.47774  |
| P2E0S...2-..  | -0.50917 | -1.23081 | 0.40607  | VS3-C...5... | 2.05627  | 0.36003  | 0.32778  | o.....       | 2.16368  | 2.02107  | 0.22965  |
| P2E0o...0-..  | 1.89592  | 0.20062  | -0.31327 | VS3-C...6... | 0.39839  | -0.19758 | -0.54953 | o...1...(... | 0.01539  | 2.03773  | 0.18066  |
| P2E0o...1-..  | 1.81868  | 2.1456   | 1.20463  | VS3-C...7... | 0.07255  | 0.35975  | -0.89649 | o...1.....   | -0.60189 | 0.70152  | -0.06381 |
| P2E0o...2-..  | 1.187    | 2.27725  | -0.66596 | VS3-C...8... | -0.20627 | 0.67925  | 0.09984  | o...c.....   | 0.27577  | 0.10949  | 2.34833  |
| P2E0s...0-..  | -0.53848 | -0.6088  | -0.9683  | VS3-C...9... | 0.0257   | 0.13263  | -0.03579 | o...c...2... | 2.46479  | 0.04768  | -0.86888 |
| P2E0s...1-..  | 0.92112  | 2.11073  | 0.76588  | VS3-F...4... | -1.33512 | -0.01988 | 0.11308  | o...c...c... | 1.46285  | 0.52824  | 2.32217  |
| P2E0s...2-..  | -3.41614 | -4.67095 | 0.595    | VS3-F...5... | -0.91036 | -0.64034 | -0.23904 | o...n.....   | 1.72087  | 0.54855  | 0.01586  |
| P3E0C...0-..  | 0.20249  | 0.09081  | -0.25602 | VS3-F...6... | 0.23645  | 3.37914  | 0.13481  | o...n...1... | -0.14051 | 1.95855  | 0.17407  |
| P3E0C...1-..  | 0.29926  | 1.13392  | 0.05996  | VS3-F...7... | 0.17514  | -0.68282 | -0.79501 | o...n...c... | 2.53897  | 1.06468  | 0.11088  |

|              |          |          |          |              |          |          |          |              |          |          |          |
|--------------|----------|----------|----------|--------------|----------|----------|----------|--------------|----------|----------|----------|
| P3E0C...2-.. | -0.67287 | 0.18632  | 0.18181  | VS3-Br..4... | 3.9539   | 6.75096  | 6.52499  | s...(.....   | 0.45445  | 2.22397  | -0.3418  |
| P3E0C...3-.. | 0.72786  | 0.12766  | 0.40738  | VS3-Br..5... | 2.37043  | -0.849   | 0.00788  | s...(...1... | 0.71452  | 1.50194  | 3.06742  |
| P3E0C...4-.. | -0.50027 | 0.15772  | 0.14163  | VS3-Cl..3... | -0.58406 | 0.90094  | -0.16471 | s...(...c... | -0.43673 | 0.11953  | 0.00222  |
| P3E0C...5-.. | 0.41334  | 2.48911  | 0.01488  | VS3-Cl..4... | 0.4173   | 2.31084  | 0.03566  | s.....       | 2.44393  | 0.16738  | 0.09162  |
| P3E0C...6-.. | 0.05245  | -0.88925 | -0.21731 | VS3-Cl..5... | -0.89772 | -0.39305 | 2.06156  | s...1...(... | -0.99382 | 2.17211  | 0.15119  |
| P3E0F...1-.. | 0.48122  | -0.95898 | 0.47254  | VS3-Cl..6... | 0.33928  | 0.68634  | 0.1048   | s...1.....   | 0.08795  | 2.09146  | 0.43888  |
| P3E0F...2-.. | -0.00605 | -0.11568 | -0.74316 | VS3-Cl..7... | -0.85429 | 2.30468  | 0.74727  | s...1...c... | 1.27604  | 2.44332  | -0.08635 |
| P3E0Br..1-.. | 0.09744  | 2.37415  | 0.06763  | VS3-N...10.. | -1.33491 | -1.05397 | -0.0446  | s...c...(... | -1.17212 | 0.37889  | 0.10349  |
| P3E0Br..2-.. | -0.19665 | 0.83073  | 0.07061  | VS3-N...11.. | 2.40105  | 4.69309  | 2.36349  | s...c.....   | 0.10404  | 2.14332  | 2.14193  |
| P3E0Cl..1-.. | 3.2201   | 2.04716  | 0.16756  | VS3-N...12.. | -1.45613 | -4.96898 | 0.40651  | s...c...1... | -0.69194 | 0.49128  | 0.05294  |
| P3E0Cl..2-.. | 0.28472  | -1.48493 | -1.34618 | VS3-N...13.. | -0.55273 | 0.29137  | 0.05122  | s...c...c... | 2.40149  | 0.2165   | 0.14036  |
| P3E0N...0-.. | 0.75016  | -0.83259 | 0.08232  | VS3-N...14.. | 2.49151  | 0.05715  | 0.10668  | s...c...n... | 2.89276  | -0.19948 | 1.41667  |
| P3E0N...1-.. | 0.47784  | -0.76137 | 0.40831  | VS3-N...15.. | 1.48903  | 1.02278  | 2.21273  | s...n.....   | -1.34853 | -0.70957 | -0.12006 |
| P3E0N...2-.. | 0.42529  | 1.24658  | 0.05676  | VS3-N...16.. | 0.24763  | -0.59101 | 0.48276  | s...n...n... | -2.01941 | -1.73913 | -0.51348 |
| P3E0N...3-.. | -0.07838 | -0.66316 | 0.66957  | VS3-N...17.. | 0.0118   | -0.35854 | 0.23863  |              |          |          |          |

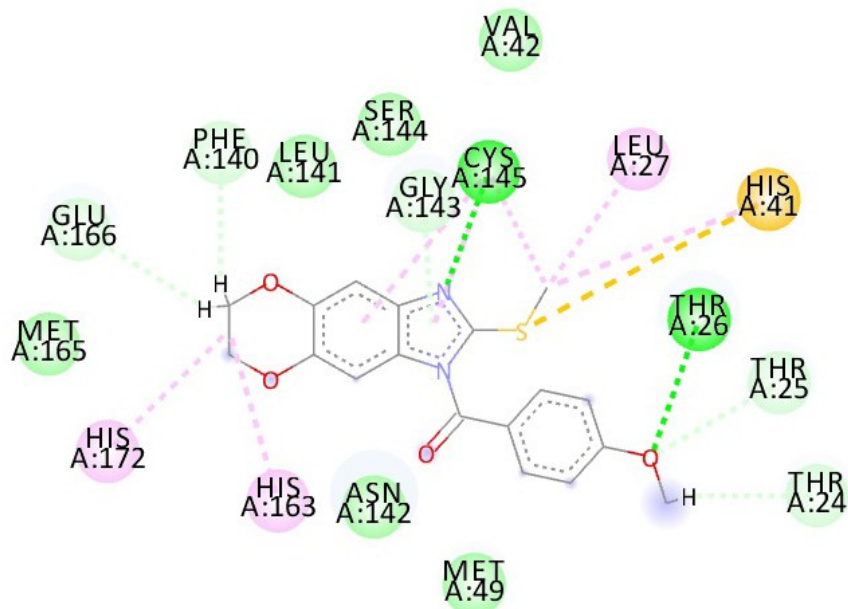

**Interactions**

- |                                                                  |                                                      |
|------------------------------------------------------------------|------------------------------------------------------|
| <span style="color: green;">■</span> van der Waals               | <span style="color: yellow;">■</span> Pi-Sulfur      |
| <span style="color: red;">■</span> Conventional Hydrogen Bond    | <span style="color: pink;">■</span> Amide-Pi Stacked |
| <span style="color: lightgreen;">■</span> Carbon Hydrogen Bond   | <span style="color: lightpurple;">■</span> Alkyl     |
| <span style="color: lightgreen;">■</span> Pi-Donor Hydrogen Bond | <span style="color: darkpurple;">■</span> Pi-Alkyl   |

Figure S1. Two-dimensional representation of the interaction between molecule A and amino acids inside 3CLpro binding pocket.

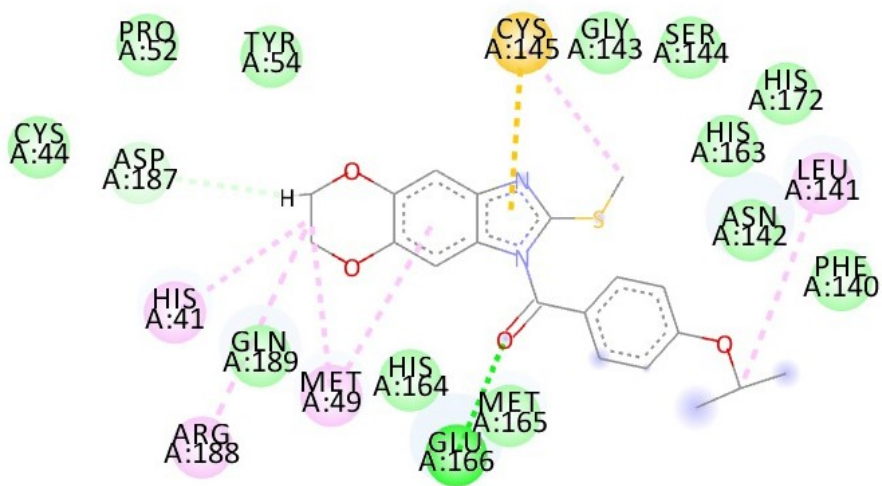

**Interactions**

- |                                                                |                                                     |
|----------------------------------------------------------------|-----------------------------------------------------|
| <span style="color: green;">■</span> van der Waals             | <span style="color: yellow;">■</span> Pi-Sulfur     |
| <span style="color: red;">■</span> Conventional Hydrogen Bond  | <span style="color: pink;">■</span> Alkyl           |
| <span style="color: lightgreen;">■</span> Carbon Hydrogen Bond | <span style="color: lightpurple;">■</span> Pi-Alkyl |

Figure S2. Two-dimensional representation of the interaction between molecule A1 and amino acids inside 3CLpro binding pocket.

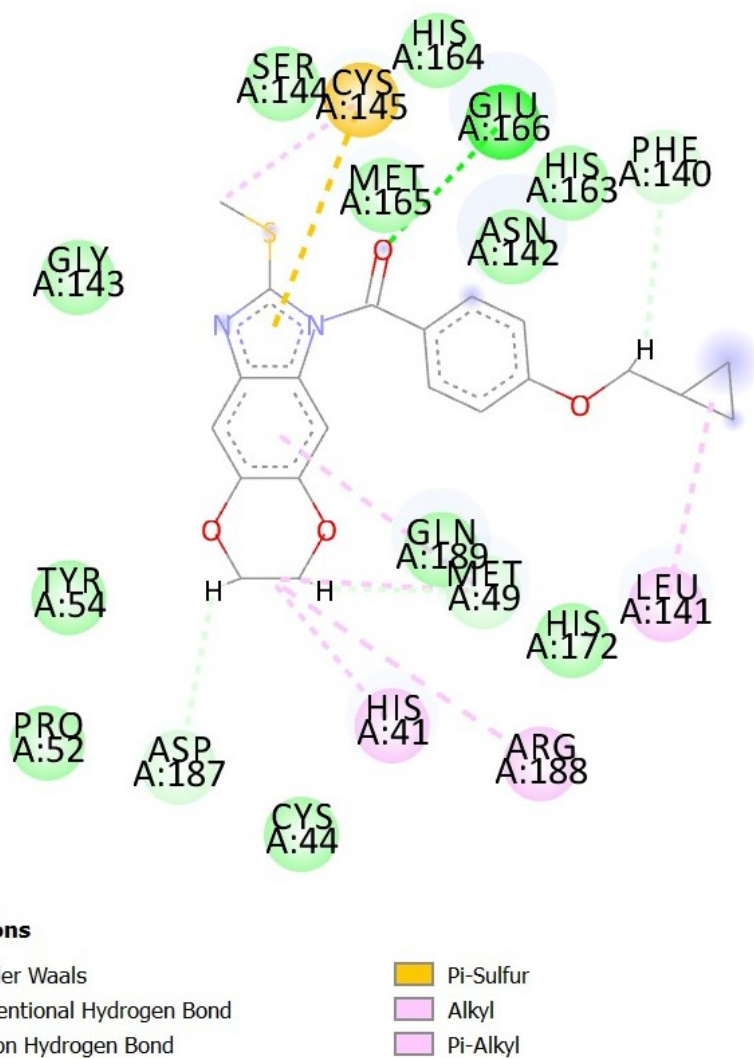

Figure S3. Two-dimensional representation of the interaction between molecule A2 and amino acids inside 3CLpro binding pocket.



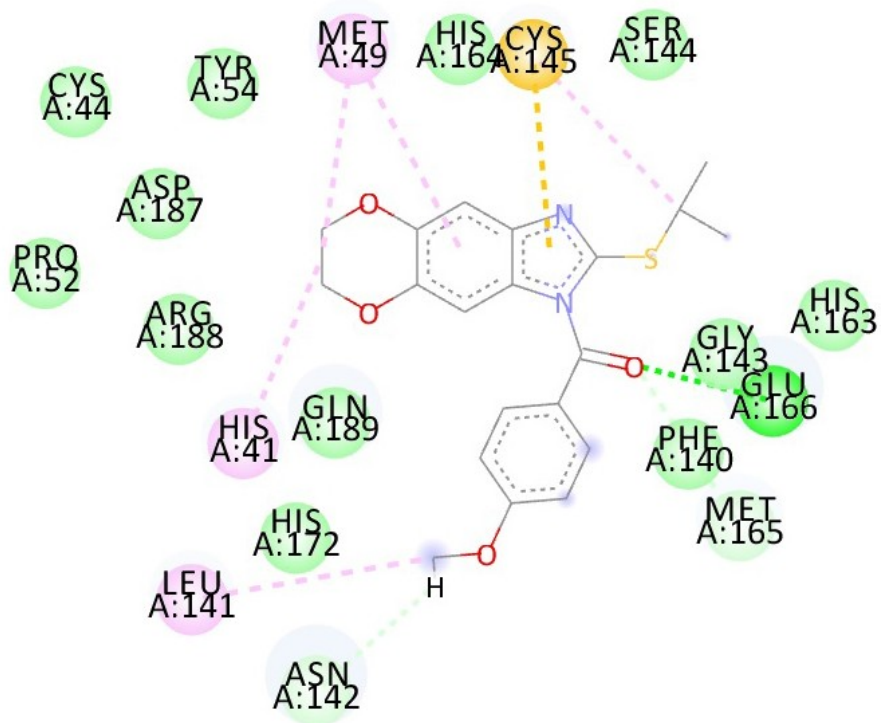

**Interactions**

- |                                                                 |                                                   |
|-----------------------------------------------------------------|---------------------------------------------------|
| <span style="color: lightgreen;">■</span> van der Waals         | <span style="color: yellow;">■</span> Pi-Sulfur   |
| <span style="color: green;">■</span> Conventional Hydrogen Bond | <span style="color: pink;">■</span> Alkyl         |
| <span style="color: lightgreen;">■</span> Carbon Hydrogen Bond  | <span style="color: lightpink;">■</span> Pi-Alkyl |

Figure S4. Two-dimensional representation of the interaction between molecule A3 and amino acids inside 3CLpro binding pocket.

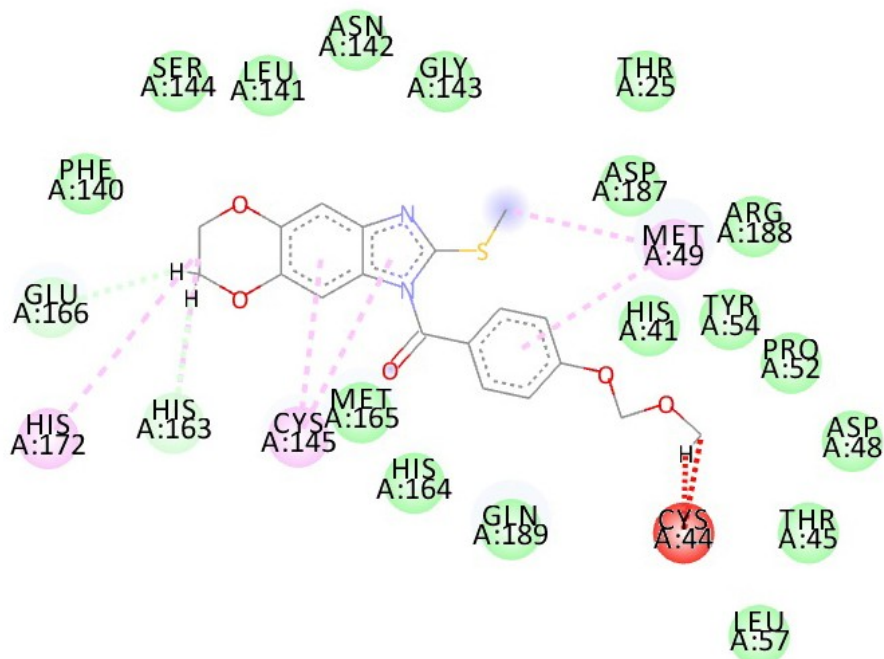

#### Interactions

- |                                                                |                                                |
|----------------------------------------------------------------|------------------------------------------------|
| <span style="color: green;">■</span> van der Waals             | <span style="color: pink;">■</span> Alkyl      |
| <span style="color: red;">■</span> Unfavorable Bump            | <span style="color: purple;">■</span> Pi-Alkyl |
| <span style="color: lightgreen;">■</span> Carbon Hydrogen Bond |                                                |

Figure S5. Two-dimensional representation of the interaction between molecule A4 and amino acids inside 3CLpro binding pocket.

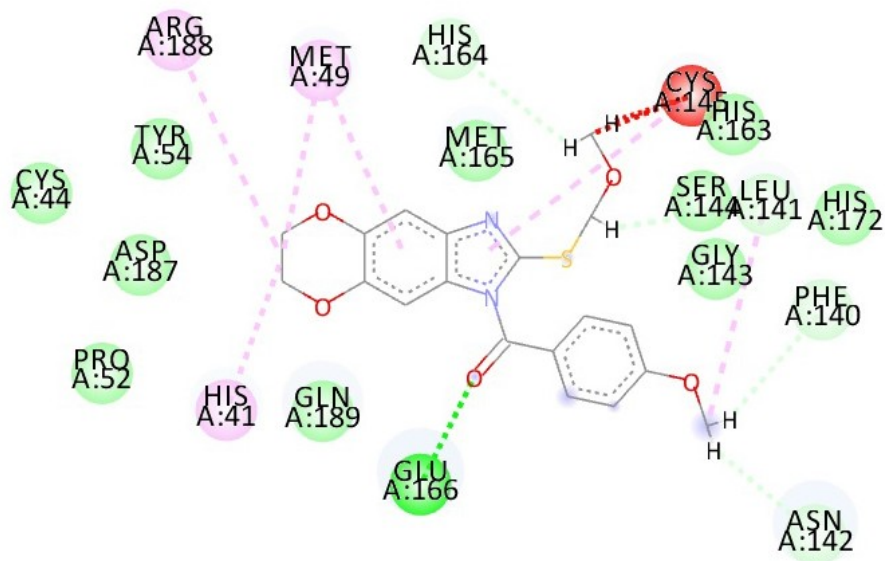

**Interactions**

- |                                                                 |                                                                |
|-----------------------------------------------------------------|----------------------------------------------------------------|
| <span style="color: lightgreen;">■</span> van der Waals         | <span style="color: lightgreen;">■</span> Carbon Hydrogen Bond |
| <span style="color: red;">■</span> Unfavorable Bump             | <span style="color: pink;">■</span> Alkyl                      |
| <span style="color: green;">■</span> Conventional Hydrogen Bond | <span style="color: lightpink;">■</span> Pi-Alkyl              |

Figure S6. Two-dimensional representation of the interaction between molecule A5 and amino acids inside 3CLpro binding pocket.
